# Supplementary material for: Limited locomotive ability relaxed selective constraints on molluscs mitochondrial genomes
Source: PubMed Central journal article supplement (PMC5587578; doi:10.1038/s41598-017-11117-z), 2017-09-06
Supplement: 41598_2017_11117_MOESM1_ESM.pdf [file 41598_2017_11117_MOESM1_ESM.pdf]

**Limited locomotive ability relaxed selective constraints on molluscs mitochondrial genomes**

Shao'e Sun<sup>1</sup>, Qi Li<sup>1,2\*</sup>, Lingfeng Kong<sup>1</sup>, Hong Yu<sup>1</sup>

<sup>1</sup>*Key Laboratory of Mariculture, Ministry of Education, Ocean University of China, Qingdao 266003, China*

<sup>2</sup>*Laboratory for Marine Fisheries Science and Food Production Processes, Qingdao National Laboratory for Marine Science and Technology*

\* Correspondence author at : Key Laboratory of Mariculture, Ministry of Education, Ocean University of China, Yushan Road 5, Qingdao 266003, China.

Tel and fax: +86-532-82031622

E-mail address: qili66@ouc.edu.cn (Q. Li)

.

**Supplementary Table 1.** List of 256 mt genomes for molluscs and their molecular traits.

| Accession No. | Species                         | Group | Combined 12 mt genes |        |        |        |        |        |        |        | Ka/Ks  |        |        |        |        |        |        |        |
|---------------|---------------------------------|-------|----------------------|--------|--------|--------|--------|--------|--------|--------|--------|--------|--------|--------|--------|--------|--------|--------|
|               |                                 |       | Ka/Ks                | Ka     | Ks     | Atp6   | Atp8   | CO1    | CO2    | CO3    | Cytb   | ND1    | ND2    | ND3    | ND4    | ND4L   | ND5    | ND6    |
| AB729113      | <i>Scapharca broughtonii</i>    | 1     | 0.0907               | 0.0091 | 0.0998 |        |        | 0.0283 | 0.0157 |        | 0.0059 | 0.0423 | 0.0834 |        |        | 0.1226 | 0.0560 | 0.0001 |
| AB809077      | <i>Fulvia mutica</i>            | 1     | 0.0382               | 0.1699 | 4.4488 | 0.0364 | 0.6130 | 0.0192 | 0.0072 | 0.0339 | 0.0213 | 0.0555 | 0.0041 | 0.0026 | 0.0377 | 0.1013 | 0.0500 | 0.3063 |
| AF177226      | <i>Crassostrea gigas</i>        | 1     | 0.2968               | 0.0193 | 0.0650 | 0.7069 |        | 0.0124 | 0.0001 | 0.0218 | 0.0421 | 0.2656 | 0.1808 | 0.0527 | 0.1102 | 0.0001 | 0.2303 | 0.5797 |
| AB065375      | <i>Venerupis philippinarum</i>  | 1     | 0.0357               | 0.2178 | 6.0958 | 0.0598 |        | 0.0073 | 0.0228 | 0.0332 | 0.0277 | 0.0503 | 0.0608 | 0.0861 | 0.0227 | 1.1707 | 0.0070 | 0.3303 |
| AB271769      | <i>Mizuhopecten yessoensis</i>  | 1     | 0.0584               | 0.0823 | 1.4088 | 0.0478 |        | 0.0169 | 0.0889 | 0.0681 | 0.0616 | 0.0297 | 0.0875 | 0.0185 | 0.0307 | 0.0525 | 0.0412 | 0.0673 |
| KF534717      | <i>Laternula elliptica</i>      | 1     | 0.1382               | 0.3724 | 2.6936 | 0.0850 | 0.0114 | 0.0636 | 0.1100 | 0.1095 | 0.0746 | 0.0678 | 0.1477 | 0.0507 | 0.1939 | 0.0662 | 0.0905 | 0.0579 |
| KF296320      | <i>Solenia oleivora</i>         | 1     | 0.0556               | 0.0286 | 0.5140 | 0.0426 | 0.1180 | 0.0017 | 0.0373 | 0.0269 | 0.0368 | 0.0359 | 0.1227 | 0.0841 | 0.0649 | 0.0559 | 0.0574 | 0.0617 |
| KC768038      | <i>Ostrea lurida</i>            | 1     | 0.0370               | 0.0350 | 0.9460 | 0.0036 | 0.2918 | 0.0151 | 0.0037 | 0.0722 | 0.0598 | 0.0760 | 0.0383 | 0.0284 | 0.0181 | 0.0719 | 0.0264 | 0.1433 |
| KC153059      | <i>Atrina pectinata</i>         | 1     | 0.0469               | 0.2745 | 5.8554 | 0.0113 |        | 0.0265 | 0.0075 | 0.0259 | 0.0774 | 0.0248 | 0.3415 | 0.1030 | 0.0157 | 0.0238 | 0.1045 | 0.0919 |
| JQ970425      | <i>Perna viridis</i>            | 1     | 0.0311               | 0.1932 | 6.2198 | 0.0019 | 0.0130 | 0.0135 | 0.0447 | 0.0548 | 0.0581 | 0.0167 | 0.0147 | 0.0100 | 0.0577 | 0.0012 | 0.0443 | 0.0696 |
| JN786377      | <i>Solen strictus</i>           | 1     | 0.0331               | 0.0326 | 0.9841 | 0.0938 |        | 0.0042 | 0.0044 |        | 0.0334 | 0.0279 | 0.1669 | 0.0571 | 0.0048 | 0.0135 | 0.0138 | 0.0348 |
| EU145977      | <i>Meretrix petechialis</i>     | 1     | 0.1025               | 0.0009 | 0.0088 | 0.0000 |        | 0.0001 | 0.0001 | 0.0000 | 0.5377 |        | 0.1904 | 0.0002 | 0.0002 | 0.0000 | 0.0000 | 0.0001 |
| KF030964      | <i>Anodonta anatina</i>         | 1     | 0.0543               | 0.0279 | 0.5127 | 0.0496 |        | 0.0090 | 0.0212 | 0.0185 | 0.0405 | 0.0548 | 0.0510 | 0.0301 | 0.0877 | 0.1430 | 0.0665 | 0.0957 |
| KF214684      | <i>Mimachlamys senatoria</i>    | 1     | 0.0767               | 0.0647 | 0.8437 | 0.0218 | 0.3812 | 0.0131 | 0.0196 | 0.0253 | 0.0237 | 0.0115 | 0.0591 | 0.0866 | 0.0194 | 0.0130 | 0.0565 | 0.0233 |
| KC109779      | <i>Lamprotula tortuosa</i>      | 1     | 0.0452               | 0.0182 | 0.4028 | 0.0307 |        | 0.0018 | 0.0280 | 0.0201 | 0.0255 | 0.0318 | 0.0562 | 0.0935 | 0.0317 | 0.0813 | 0.0695 | 0.1482 |
| FJ986302      | <i>Cristaria plicata</i>        | 1     | 0.0349               | 0.0231 | 0.6627 | 0.0429 |        | 0.0027 | 0.0277 | 0.0206 | 0.0395 | 0.0291 | 0.0477 | 0.0468 | 0.0543 | 0.0948 | 0.0384 | 0.0655 |
| JQ423460      | <i>Coelomactra antiquata</i>    | 1     | 0.0122               | 0.0609 | 5.0074 | 0.0006 |        | 0.0030 | 0.0389 | 0.0067 | 0.0180 | 0.0178 | 0.0509 | 0.1096 | 0.0104 | 0.0583 | 0.0185 | 0.0123 |
| DQ088274      | <i>Placopecten magellanicus</i> | 1     | 0.0578               | 0.1564 | 2.7044 | 0.0641 |        | 0.0299 | 0.0672 | 0.0266 | 0.0674 | 0.0296 | 0.0819 | 0.0355 | 0.0518 | 0.1251 | 0.1376 | 0.1027 |
| GQ527172      | <i>Mytilus californianus</i>    | 1     | 0.0222               | 0.0112 | 0.5026 | 0.0305 |        | 0.0059 | 0.0079 | 0.0019 | 0.0142 | 0.0326 |        | 0.0001 | 0.0188 | 0.0284 | 0.0387 |        |
| HQ283346      | <i>Sinanodonta woodiana</i>     | 1     | 0.0566               | 0.0264 | 0.4663 | 0.0846 |        | 0.0057 | 0.0250 | 0.0249 | 0.0407 | 0.0387 | 0.1681 | 0.2238 | 0.0578 | 0.0510 | 0.0970 | 0.0927 |

|          |                                  |   |           |        |        |        |        |        |        |        |        |        |        |        |        |        |        |        |
|----------|----------------------------------|---|-----------|--------|--------|--------|--------|--------|--------|--------|--------|--------|--------|--------|--------|--------|--------|--------|
| EU880278 | <i>Sinonovacula constricta</i>   | 1 | 0.0385    | 0.1852 | 4.8116 | 0.0165 | 0.0170 | 0.0056 | 0.0139 | 0.0433 | 0.0856 | 0.1151 | 0.1165 | 0.0141 | 0.0168 | 0.0556 | 0.1046 |        |
| EU715252 | <i>Chlamys farreri</i>           | 1 | 0.0683    | 0.0969 | 1.4186 | 0.0742 | 0.0147 | 0.1172 | 0.0189 | 0.0700 | 0.0239 | 0.1220 | 0.0367 | 0.0344 | 0.0311 | 0.0662 | 0.0404 |        |
| EU266073 | <i>Crassostrea hongkongensis</i> | 1 | 0.0486    | 0.0180 | 0.3705 | 0.0178 | 0.0091 | 0.0068 | 0.0304 | 0.0444 | 0.0400 | 0.0448 | 0.0851 | 0.0466 | 0.0181 | 0.0715 | 0.0004 |        |
| AY905542 | <i>Crassostrea virginica</i>     | 1 | 0.0348    | 0.0744 | 2.1364 | 0.0196 | 0.0135 | 0.0078 | 0.0561 | 0.0259 | 0.0152 | 0.0304 | 0.0022 | 0.0126 | 0.1459 | 0.0345 | 0.0024 |        |
| JF274008 | <i>Ostrea edulis</i>             | 1 | 0.0491    | 0.0507 | 1.0310 | 0.0023 | 0.0308 |        | 0.0577 | 0.0491 | 0.0113 | 0.0162 |        | 0.0748 | 0.0487 | 0.0326 | 0.0689 |        |
| FJ841968 | <i>Saccostrea mordax</i>         | 1 | 0.0323    | 0.0387 | 1.1964 | 0.0209 | 0.0123 |        | 0.0268 | 0.0266 | 0.0177 | 0.0511 |        | 0.0414 | 0.0081 | 0.0244 | 0.1378 |        |
| FJ415225 | <i>Mimachlamys nobilis</i>       | 1 | 0.0443    | 0.0442 | 0.9989 | 0.0887 | 0.0130 | 0.0727 | 0.0306 | 0.0387 | 0.0150 | 0.0383 | 0.1051 | 0.0280 | 0.0070 | 0.0636 | 0.0366 |        |
| FJ841967 | <i>Crassostrea iredalei</i>      | 1 | 0.0654    | 0.0541 | 0.8279 | 0.0238 | 0.0095 | 0.0110 | 0.0733 | 0.1042 | 0.0609 | 0.2974 | 0.0612 | 0.0793 | 0.0221 | 0.0588 | 0.0890 |        |
| FJ841966 | <i>Crassostrea sikamea</i>       | 1 | 0.0534    | 0.0159 | 0.2975 | 0.0350 | 0.0001 | 0.0001 | 0.0216 | 0.0585 | 0.0286 | 0.0609 | 0.0551 | 0.0626 | 0.0001 | 0.1636 | 0.0691 |        |
| FJ841965 | <i>Crassostrea angulata</i>      | 1 | 0.0770    | 0.0039 | 0.0507 | 0.0001 | 0.0001 | 0.0001 | 0.1067 | 0.0314 | 0.0621 | 0.2028 | 0.4067 | 0.0724 | 0.2624 | 0.1025 | 0.0641 |        |
| FJ841964 | <i>Crassostrea ariakensis</i>    | 1 | 0.0975    | 0.0494 | 0.5066 | 0.0032 | 0.0193 | 0.0043 | 0.0666 | 0.1408 | 0.0597 | 0.2250 | 0.0679 | 0.0916 | 0.1069 | 0.1073 | 0.3181 |        |
| GU936625 | <i>Mytilus trossulus</i>         | 1 | 0.0244    | 0.0134 | 0.5501 | 0.0167 | 0.0038 | 0.0025 | 0.0001 | 0.0132 | 0.0145 | 0.0668 |        | 0.0490 | 0.0145 | 0.0423 | 0.0528 |        |
| HQ641406 | <i>Hyriopsis schlegelii</i>      | 1 | 0.0459    | 0.0115 | 0.2505 | 0.0198 | 0.0035 | 0.0531 | 0.0105 | 0.0319 | 0.0351 | 0.0596 |        | 0.0475 | 0.0001 | 0.0514 | 0.0674 |        |
| HQ703012 | <i>Solen grandis</i>             | 1 | 0.0183    | 0.0263 | 1.4369 | 0.0160 | 0.0010 |        | 0.0055 | 0.0123 | 0.0188 | 0.0505 | 0.0109 | 0.0078 | 0.0057 | 0.0072 | 0.0179 |        |
| DQ632742 | <i>Hiatella arctica</i>          | 1 | 0.0990    | 0.4451 | 4.4964 | 0.2868 | 0.0165 | 0.0464 | 0.1977 | 0.0127 | 0.1309 | 0.0811 | 0.1201 | 0.5193 | 0.1167 |        | 0.0894 | 0.3495 |
| HM015198 | <i>Crassostrea nippona</i>       | 1 | 0.0681    | 0.0441 | 0.6465 | 0.0233 | 0.0174 | 0.0495 | 0.0908 | 0.0525 | 0.0325 | 0.0772 | 0.0722 | 0.0719 | 0.0523 | 0.1046 | 0.0740 |        |
| EU023915 | <i>Argopecten irradians</i>      | 1 | 0.0413    | 0.0358 | 0.8675 | 0.0054 | 0.0001 | 0.0917 | 0.0001 | 0.0107 |        | 0.0282 |        | 0.0170 | 0.0119 | 0.0473 |        |        |
| HM467838 | <i>Pinctada margaritifera</i>    | 1 | 0.0479    | 0.0669 | 1.3966 | 0.1973 | 0.0034 | 0.0590 | 0.0078 | 0.0413 | 0.0559 | 0.0372 | 0.0565 | 0.0301 |        | 0.0191 | 0.2886 |        |
| GQ452847 | <i>Pinctada maxima</i>           | 1 | 0.0428    | 0.0597 | 1.3940 | 0.1112 | 0.0126 | 0.0291 | 0.0052 | 0.0218 | 0.1095 |        | 0.0042 | 0.0271 | 0.0292 | 0.0157 | 0.0835 |        |
| AY484747 | <i>Mytilus edulis</i>            | 1 | 0.3035    | 0.0170 | 0.0561 | 0.0001 | 0.0177 | 0.0002 |        | 0.7547 | 0.0001 | 0.4599 | 0.0000 | 0.1913 | 0.0001 | 0.0452 | 1.0220 |        |
| AY497292 | <i>Mytilus galloprovincialis</i> | 1 | N*dN < 20 | 0.0016 | 0.0001 | 0.0000 | 0.0001 | 0.0883 | 0.0001 | 0.0000 | 0.0001 | 0.2531 | 0.0001 | 0.0492 | 0.0000 |        |        |        |
| GU001954 | <i>Musculista senhousia</i>      | 1 | 0.0579    | 0.2475 | 4.2721 | 0.0540 | 0.0198 | 0.1767 | 0.0731 | 0.0359 | 0.1045 | 0.0650 | 0.0040 | 0.0943 | 0.1389 | 0.0559 | 0.0683 |        |
| GU269271 | <i>Paphia euglypta</i>           | 1 | 0.0274    | 0.0375 | 1.3662 | 0.0138 | 0.0085 | 0.0448 | 0.0227 | 0.0176 | 0.0327 | 0.0880 | 0.0178 | 0.0762 | 0.0001 | 0.0277 | 0.0646 |        |
| GU071281 | <i>Meretrix lamarckii</i>        | 1 | 0.1010    | 0.0638 | 0.6314 | 0.0780 | 0.0001 | 0.0457 | 0.2167 | 0.1385 | 0.0828 | 0.0066 | 0.1492 | 0.0612 | 0.0442 | 0.1590 | 0.0790 | 0.0142 |

|          |                                  |   |        |        |        |        |        |        |        |        |        |        |        |        |        |        |        |        |
|----------|----------------------------------|---|--------|--------|--------|--------|--------|--------|--------|--------|--------|--------|--------|--------|--------|--------|--------|--------|
| GQ463598 | <i>Meretrix meretrix</i>         | 1 | 0.0378 | 0.0005 | 0.0129 | 0.2694 |        | 0.0000 | 0.0000 | 0.0001 | 0.0001 | 0.0000 | 0.0940 | 0.1328 | 0.0001 | 0.0001 | 0.1120 | 0.0588 |
| KF363951 | <i>Arctica islandica</i>         | 1 | 0.0248 | 0.1386 | 5.5958 | 0.0310 |        | 0.0173 | 0.0093 | 0.0075 | 0.0232 | 0.0169 | 0.0535 | 0.0245 | 0.0270 | 0.0165 | 0.0367 | 0.1801 |
| JF969278 | <i>Paphia undulata</i>           | 1 | 0.0276 | 0.0345 | 1.2511 | 0.0197 | 0.0001 | 0.0088 | 0.0325 |        | 0.0113 | 0.0316 | 0.0492 | 0.0106 | 0.0141 |        | 0.0361 | 0.0311 |
| JF969277 | <i>Paphia textile</i>            | 1 | 0.0282 | 0.0298 | 1.0568 | 0.0208 |        | 0.0062 | 0.0703 | 0.0048 | 0.0213 | 0.0273 | 0.0315 | 0.0066 | 0.0395 | 0.0146 | 0.0479 | 0.0987 |
| JF969276 | <i>Paphia amabilis</i>           | 1 | 0.0600 | 0.0411 | 0.6860 | 0.0222 | 0.0162 | 0.0598 | 0.0411 | 0.0369 | 0.0672 | 0.0266 | 0.0408 | 0.0270 | 0.0224 |        | 0.0693 | 0.1035 |
| GQ903339 | <i>Meretrix lusoria</i>          | 1 | 0.0654 | 0.0129 | 0.1969 | 0.0370 |        | 0.0251 | 0.0961 | 0.0195 | 0.0499 | 0.0222 | 0.0985 | 0.0001 | 0.2169 | 0.1643 | 0.0792 | 0.2989 |
| EF043342 | <i>Lucinella divaricata</i>      | 1 | 0.0094 | 0.0424 | 4.4955 | 0.1626 | 0.1032 | 0.0053 | 0.0046 | 0.0027 | 0.0159 | 0.0209 | 0.0647 | 0.0040 | 0.0091 | 0.0233 | 0.0041 | 0.2772 |
| EF043341 | <i>Loripes lacteus</i>           | 1 | 0.0105 | 0.0553 | 5.2461 | 0.0124 | 0.1752 | 0.0001 | 0.0085 | 0.0017 | 0.0102 | 0.0817 | 0.0926 | 0.0099 | 0.0096 | 0.0178 | 0.0009 | 0.0389 |
| DQ632743 | <i>Acanthocardia tuberculata</i> | 1 | 0.0481 | 0.1819 | 3.7826 | 0.0097 |        | 0.0208 | 0.0074 | 0.0157 | 0.0211 | 0.0478 | 0.1627 | 0.0234 | 0.0751 | 0.4939 | 0.1067 | 0.2459 |
| JN398367 | <i>Solecurtus divaricatus</i>    | 1 | 0.0169 | 0.0705 | 4.1617 | 0.0202 |        | 0.0128 | 0.0206 | 0.0990 | 0.0422 | 0.0579 | 0.0764 | 0.0308 | 0.0198 | 0.0445 | 0.0022 | 0.0400 |
| JN398365 | <i>Semele scabra</i>             | 1 | 0.0185 | 0.1184 | 6.4032 | 0.0081 |        | 0.0075 | 0.0157 | 0.0167 | 0.0342 | 0.0598 | 0.0711 | 0.0082 | 0.0214 | 0.0453 | 0.0069 | 0.0745 |
| JN398364 | <i>Nuttallia olivacea</i>        | 1 | 0.0176 | 0.1339 | 7.6300 | 0.0559 |        | 0.0121 | 0.0101 | 0.0112 | 0.0253 | 0.0400 | 0.0916 | 0.0129 | 0.0201 | 0.0359 | 0.0128 | 0.0258 |
| JN398363 | <i>Soletellina diphos</i>        | 1 | 0.0134 | 0.0723 | 5.3986 | 0.0137 |        | 0.0087 | 0.0359 | 0.0905 | 0.0197 | 0.0293 | 0.0881 | 0.1082 | 0.0122 | 0.0265 | 0.0167 | 0.0341 |
| JN398362 | <i>Moerella iridescens</i>       | 1 | 0.0151 | 0.0839 | 5.5424 | 0.0241 |        | 0.0061 | 0.0096 | 0.0031 | 0.0070 | 0.0229 | 0.0085 | 0.0346 | 0.0259 | 0.0015 | 0.0233 | 0.0728 |
| KC832317 | <i>Meretrix lyrata</i>           | 1 | 0.0573 | 0.0541 | 0.9438 |        | 0.0072 | 0.0473 | 0.0760 | 0.1010 | 0.0476 | 0.0259 | 0.1848 | 0.0084 | 0.0438 | 0.0793 | 0.0350 | 0.0995 |
| AY365193 | <i>Lampsilis ornata</i>          | 1 | 0.0677 | 0.0324 | 0.4784 | 0.0772 | 0.0250 | 0.0073 | 0.0530 | 0.0240 | 0.0644 | 0.0472 | 0.0958 | 0.1727 | 0.0932 | 0.1196 | 0.0618 | 0.1528 |
| HM347668 | <i>Hyriopsis cumingii</i>        | 1 | 0.0596 | 0.0126 | 0.2115 | 0.1685 | 0.1741 | 0.0001 | 0.0234 | 0.0119 | 0.0430 | 0.1631 | 0.1192 | 0.0211 | 0.0873 |        | 0.0698 | 0.0650 |
| KC848654 | <i>Solenia carinatus</i>         | 1 | 0.0542 | 0.0251 | 0.4624 | 0.0621 | 0.1783 | 0.0055 | 0.0319 | 0.0445 | 0.0706 | 0.0395 | 0.1073 | 0.1692 | 0.0374 | 0.0356 | 0.0602 | 0.0910 |
| HM856639 | <i>Toxolasma parvus</i>          | 1 | 0.0778 | 0.0417 | 0.5363 | 0.0809 | 0.0135 | 0.0134 | 0.0401 | 0.0232 | 0.0525 | 0.0456 | 0.1014 | 0.0920 | 0.0948 | 0.0581 | 0.0899 | 0.1081 |
| HM856638 | <i>Lasmigona compressa</i>       | 1 | 0.0534 | 0.0257 | 0.4814 | 0.0366 | 0.0566 | 0.0173 | 0.0636 | 0.0442 | 0.0414 | 0.0676 | 0.0589 |        | 0.0682 | 0.1093 | 0.0765 | 0.0627 |
| HM856637 | <i>Utterbackia imbecillis</i>    | 1 | 0.0754 | 0.0380 | 0.5039 | 0.1575 |        | 0.0081 | 0.0267 | 0.0421 | 0.1127 | 0.0677 | 0.0885 | 0.0812 | 0.0905 | 0.1471 | 0.1252 | 0.1197 |
| HM856635 | <i>Utterbackia peninsularis</i>  | 1 | 0.0496 | 0.2065 | 4.1630 | 0.0177 | 0.0107 | 0.0191 | 0.0416 | 0.0020 | 0.1196 | 0.0822 | 0.1027 | 0.1512 | 0.0209 | 0.3393 | 0.0371 | 0.0389 |
| HM856634 | <i>Margaritifera falcata</i>     | 1 | 0.0510 | 0.0200 | 0.3914 | 0.0492 | 0.0600 | 0.0089 | 0.0096 | 0.0300 | 0.0466 | 0.0330 | 0.1461 | 0.1025 | 0.0592 | 0.0001 |        | 0.0449 |
| HM014130 | <i>Unio pictorum</i>             | 1 | 0.0561 | 0.0313 | 0.5570 | 0.0910 | 0.1912 | 0.0092 | 0.0333 | 0.0171 | 0.0524 | 0.0699 | 0.0522 | 0.0714 | 0.0500 | 0.1272 | 0.0630 | 0.1158 |

|          |                                    |   |        |        |        |        |        |        |        |        |        |        |        |        |        |        |        |        |
|----------|------------------------------------|---|--------|--------|--------|--------|--------|--------|--------|--------|--------|--------|--------|--------|--------|--------|--------|--------|
| FJ809754 | <i>Pyganodon grandis</i>           | 1 | 0.0550 | 0.0295 | 0.5357 | 0.1014 | 0.0001 | 0.0068 | 0.0499 | 0.0162 | 0.0914 | 0.0448 | 0.0696 | 0.0410 | 0.0621 | 0.0245 | 0.0668 | 0.0915 |
| FJ809752 | <i>Venustaconcha ellipsiformis</i> | 1 | 0.0453 | 0.2116 | 4.6727 | 0.0141 | 0.1120 | 0.0101 | 0.0309 | 0.0197 | 0.1933 | 0.1625 | 0.4402 | 0.1451 | 0.0178 | 0.1303 | 0.0277 | 0.2511 |
| FJ809750 | <i>Quadrula quadrula</i>           | 1 | 0.0981 | 0.0641 | 0.6531 | 0.0653 |        | 0.0161 | 0.0495 | 0.0576 | 0.0613 | 0.1039 | 0.0935 | 0.0494 | 0.1406 | 1.3450 | 0.0932 | 0.0603 |
| JQ728447 | <i>Solemya velum</i>               | 1 | 0.0461 | 0.2272 | 4.9319 | 0.0600 | 0.5677 | 0.0309 | 0.0796 | 0.0509 | 0.0300 | 0.0986 | 0.0847 | 0.1014 | 0.0325 | 0.0046 | 0.1084 | 0.0094 |
| KJ607173 | <i>Tegillarca granosa</i>          | 1 | 0.0557 | 0.1294 | 2.3212 | 0.0259 |        | 0.0083 | 0.1137 | 0.0185 | 0.0223 | 0.0848 | 0.0952 | 0.0160 | 0.0288 | 0.0179 | 0.0156 | 0.0288 |
| KF750628 | <i>Scapharca kagoshimensis</i>     | 1 | 0.1512 | 0.0950 | 0.6282 | 0.0138 |        | 0.0568 |        | 0.1299 | 0.0732 | 0.0890 |        | 0.2101 | 0.0305 | 0.0004 | 0.2443 | 2.0675 |
| JX050180 | <i>Lamprotula coreana</i>          | 1 | 0.0437 | 0.0201 | 0.4598 | 0.0388 | 0.3999 | 0.0201 | 0.0273 | 0.0089 | 0.0425 | 0.0232 | 0.0590 | 0.0364 | 0.0688 | 0.1155 | 0.0419 | 0.0608 |
| KM657954 | <i>Unio douglasiae</i>             | 1 | 0.0519 | 0.0295 | 0.5694 | 0.0713 | 0.0782 | 0.0085 | 0.0027 | 0.0087 | 0.0712 | 0.0250 | 0.0597 | 0.0245 | 0.0608 | 0.0354 | 0.0560 | 0.0873 |
| KJ754823 | <i>Mactra chinensis</i>            | 1 | 0.0128 | 0.0565 | 4.3979 | 0.0025 |        | 0.0010 | 0.0316 | 0.0029 | 0.0167 | 0.0313 | 0.0582 | 0.0054 | 0.0038 | 0.0112 | 0.0269 | 0.0523 |
| KM580067 | <i>Panopea generosa</i>            | 1 | 0.0095 | 0.0503 | 5.3072 | 0.0232 | 0.0001 | 0.0030 | 0.1959 | 0.0005 | 0.0399 | 0.0289 | 0.0491 | 0.0068 | 0.0294 | 0.0013 | 0.0071 | 0.0371 |
| KM580068 | <i>Panopea globosa</i>             | 1 | 0.0080 | 0.0457 | 5.7076 | 0.0039 |        | 0.0011 | 0.0160 | 0.0024 | 0.0319 | 0.0295 | 0.0961 | 0.0087 | 0.0348 | 0.1062 | 0.0148 | 0.0591 |
| KM233636 | <i>Brachidontes exustus</i>        | 1 | 0.0219 | 0.0881 | 4.0152 | 0.0754 | 0.5735 | 0.0235 | 0.0788 | 0.0220 | 0.0040 | 0.0068 | 0.0441 | 0.0176 | 0.0711 | 0.0295 | 0.0391 | 0.1329 |
| KJ577549 | <i>Mytilus coruscus</i>            | 1 | 0.0403 | 0.0272 | 0.6748 | 0.0053 |        | 0.0023 | 0.0033 | 0.0074 | 0.0085 | 0.0196 | 0.0465 | 0.0121 | 0.1955 | 0.0145 | 0.0566 | 0.0265 |
| KJ755996 | <i>Mya arenaria</i>                | 1 | 0.0905 | 0.4006 | 4.4287 | 0.1179 |        | 0.0732 | 0.0445 | 0.1039 | 0.1126 | 0.0038 | 0.2250 | 0.1928 | 0.0663 | 0.0367 | 0.0564 | 0.4209 |
| KF514426 | <i>Dahurinaia dahurica</i>         | 1 | 0.0421 | 0.0177 | 0.4201 | 0.0254 | 0.0001 | 0.0060 | 0.0331 | 0.0082 | 0.0365 | 0.0353 | 0.0514 | 0.0081 | 0.0602 | 0.0790 | 0.0239 | 0.1727 |
| KJ144818 | <i>Arconaia lanceolata</i>         | 1 | 0.2291 | 0.0377 | 0.1645 | 0.0703 | 0.0001 | 0.0001 | 0.0307 | 0.0001 | 0.8151 |        | 0.0807 | 0.3928 | 0.0565 | 0.0655 | 0.2054 | 0.0001 |
| KJ018924 | <i>Lamprotula gottschei</i>        | 1 | 0.0759 | 0.0432 | 0.5690 | 0.0545 | 0.0143 | 0.0223 | 0.0339 | 0.0152 | 0.0494 | 0.0422 | 0.1536 | 0.1292 | 0.0602 | 0.0770 | 0.1049 | 0.0647 |
| JQ691662 | <i>Lamprotula leai</i>             | 1 | 0.0737 | 0.0439 | 0.5958 | 0.0950 |        | 0.0115 | 0.0446 | 0.0140 | 0.0613 | 0.0660 | 0.0876 | 0.1247 | 0.0944 | 0.1093 | 0.0763 | 0.1242 |
| HG799089 | <i>Lutraria rhynchaena</i>         | 1 | 0.0278 | 0.1406 | 5.0631 | 0.1280 |        | 0.0081 | 0.0222 | 0.0312 | 0.0306 | 0.0820 | 0.0507 | 0.0316 | 0.0172 | 0.1027 | 0.0447 | 0.1188 |
| KF601246 | <i>Argopecten purpuratus</i>       | 1 | 0.0650 | 0.0171 | 0.2627 | 0.0486 |        | 0.0032 | 0.0142 | 0.0001 | 0.0241 | 0.0355 | 0.0321 |        | 0.0441 |        | 0.0113 | 0.0437 |
| KP967577 | <i>Saccostrea cucullata</i>        | 1 | 0.0271 | 0.0372 | 1.3728 | 0.0200 |        | 0.0001 | 0.0068 | 0.0246 | 0.0280 | 0.0173 | 0.0539 | 0.0042 | 0.0190 | 0.0114 | 0.0512 | 0.0440 |
| KR856227 | <i>Crassostrea gasar</i>           | 1 | 0.0329 | 0.0643 | 1.9524 | 0.0186 | 0.2727 | 0.0085 | 0.0087 | 0.0078 | 0.0089 | 0.0028 | 0.0332 | 0.0985 | 0.0310 | 0.0147 | 0.0406 | 0.0960 |
| KF667530 | <i>Anodonta arcaeformis</i>        | 1 | 0.0766 | 0.0039 | 0.0506 | 0.1123 |        | 0.0145 | 0.0001 | 0.0001 | 0.0442 | 0.1493 | 0.1044 | 0.1981 | 0.1005 | 0.3934 | 0.0886 | 0.0330 |
| KF667529 | <i>Anodonta lucida</i>             | 1 | 0.0819 | 0.0473 | 0.5767 | 0.1482 | 0.0979 | 0.0110 | 0.0603 | 0.0380 | 0.0580 | 0.0938 | 0.1221 | 0.1266 | 0.0470 | 0.0760 | 0.1020 | 0.1669 |

|          |                                         |   |        |        |        |        |        |        |        |        |        |        |        |        |        |        |        |               |
|----------|-----------------------------------------|---|--------|--------|--------|--------|--------|--------|--------|--------|--------|--------|--------|--------|--------|--------|--------|---------------|
| KM655841 | <i>Perna perna</i>                      | 1 | 0.0166 | 0.0824 | 4.9615 | 0.0487 |        | 0.0242 | 0.1074 | 0.0449 | 0.0019 | 0.0219 | 0.0074 | 0.0018 | 0.0359 | 0.0596 | 0.0139 | 0.0264        |
| KP205428 | <i>Tridacna squamosa</i>                | 1 | 0.1043 | 0.9115 | 8.7391 | 0.0054 |        | 0.0058 | 0.0142 | 0.0487 | 0.0218 | 0.3568 | 0.3273 | 0.5336 | 0.1362 | 0.7820 | 0.0161 |               |
| KP954700 | <i>Anadara vellicata</i>                | 1 | 0.0429 | 0.0681 | 1.5876 |        |        | 0.0106 | 0.0084 | 0.0065 | 0.0364 | 0.0001 |        | 0.0440 | 0.0511 | 0.0225 | 0.0090 | 0.0510        |
| KU975161 | <i>Trisidos kiyoni</i>                  | 1 | 0.0412 | 0.2676 | 6.4931 | 0.0231 |        | 0.0156 | 0.0016 | 0.0572 | 0.0250 | 0.1005 | 0.1280 | 0.0062 | 0.0889 | 0.0322 | 0.0205 | 0.0199        |
| KU975162 | <i>Potiarca pilula</i>                  | 1 | 0.0583 | 0.1416 | 2.4294 | 0.0507 |        | 0.0256 | 0.0533 | 0.0213 | 0.0442 | 0.0603 | 0.0050 | 0.0426 | 0.0469 | 0.1286 | 0.0124 | 0.1027        |
| KP187851 | <i>Anodonta euscaphys</i>               | 1 | 0.1643 | 0.0079 | 0.0481 | 0.1726 | 0.0735 | 0.0891 |        | 0.1114 | 0.1095 | 0.0805 | 0.3326 | 0.0001 | 0.4194 |        | 0.1384 | 0.2573        |
| KT247374 | <i>Potomida littoralis</i>              | 1 | 0.0672 | 0.0340 | 0.5051 | 0.0670 | 0.0001 | 0.0033 | 0.0392 | 0.0309 | 0.0593 | 0.0528 | 0.1683 | 0.0740 | 0.0505 | 0.0197 | 0.0936 | 0.1405        |
| KT723012 | <i>Leptodea leptodon</i>                | 1 | 0.0632 | 0.0224 | 0.3549 | 0.1152 | 0.0001 | 0.0070 | 0.0851 | 0.0482 | 0.0494 | 0.0374 | 0.0991 | 0.0826 | 0.0398 | 0.0001 | 0.0818 | 0.1560        |
| KJ495725 | <i>Lanceolaria grayana</i>              | 1 | 0.0988 | 0.0091 | 0.0916 | 0.0487 |        | 0.0058 | 0.0878 | 0.0951 |        | 0.0928 | 0.1036 | 0.0021 | 0.2460 | 0.1462 | 0.1855 | 0.0000        |
| KP273584 | <i>Cuneopsis pisciculus</i>             | 1 | 0.0559 | 0.0266 | 0.4762 | 0.1022 | 0.1009 | 0.0001 | 0.0526 | 0.0084 | 0.0317 | 0.0675 | 0.0974 | 0.0157 | 0.0501 | 0.0874 | 0.0654 | 0.1336        |
| KP419933 | <i>Saxidomus purpuratus</i>             | 1 | 0.0239 | 0.1295 | 5.4182 | 0.0216 |        | 0.0169 | 0.0567 | 0.0204 | 0.0452 | 0.0318 | 0.1331 | 0.0966 | 0.0174 | 0.0028 | 0.0184 | 0.1631        |
| KR862368 | <i>Calypptogena magnifica</i>           | 1 | 0.0650 | 0.2790 | 4.2939 | 0.1005 | 0.0803 | 0.0383 | 0.0891 | 0.0394 | 0.0681 | 0.0818 | 0.1309 | 0.0365 | 0.0207 | 0.0513 | 0.1166 | 0.1257        |
| KT161261 | <i>Argopecten ventricosus</i>           | 1 | 0.0310 | 0.0076 | 0.2454 | 0.0085 |        | 0.0076 | 0.0153 | 0.0119 | 0.0384 | 0.0102 | 0.2509 | 0.0254 | 0.0107 | 0.0001 | 0.0430 | 0.3691        |
| KP756905 | <i>Limnoperna fortunei</i>              | 1 | 0.0402 | 0.2612 | 6.4916 | 0.0499 | 0.2005 | 0.0286 | 0.0661 | 0.0549 | 0.0625 | 0.0208 | 0.0355 | 0.0126 | 0.0264 | 0.3734 | 0.0499 | 0.1428        |
| AY588938 | <i>Haliotis rubra</i>                   | 2 | 0.0176 | 0.0033 | 0.1899 | 0.0264 |        | 0.0121 | 0.0241 | 0.0001 | 0.0045 | 0.0706 | 0.0296 | 0.0648 | 0.0001 | 0.0538 |        | 0.0090 0.0001 |
| KJ472483 | <i>Haliotis laevigata</i>               | 2 | 0.0264 | 0.0057 | 0.2162 | 0.0136 | 0.0001 | 0.0001 | 0.0001 | 0.0001 | 0.0001 | 0.0212 | 0.0430 | 0.0300 | 0.0115 | 0.0001 |        | 0.0189 0.0110 |
| KF724723 | <i>Haliotis discus hannai</i>           | 2 | 0.0214 | 0.0128 | 0.5990 | 0.0173 | 0.0043 | 0.0001 | 0.0156 | 0.0663 | 0.0156 | 0.0075 | 0.0732 | 0.0094 | 0.0183 | 0.0614 |        | 0.0165 0.0091 |
| HQ832672 | <i>Haliotis diversicolor</i>            | 2 | 0.0285 | 0.0173 | 0.6073 | 0.0206 | 0.0408 | 0.0017 | 0.0096 | 0.0083 | 0.0046 | 0.0499 | 0.0814 | 0.0279 | 0.0324 | 0.0444 |        | 0.0388 0.0430 |
| FJ605487 | <i>Haliotis tuberculata</i>             | 2 | 0.0303 | 0.0073 | 0.2421 | 0.0204 | 0.0856 | 0.0137 | 0.0301 | 0.0227 | 0.0034 | 0.0676 | 0.0676 | 0.0001 | 0.0222 | 0.0001 |        | 0.0365 0.1412 |
| FJ599667 | <i>Haliotis tuberculata tuberculata</i> | 2 | 0.0325 | 0.0063 | 0.1944 | 0.0398 | 0.0001 | 0.0060 | 0.0001 | 0.0001 | 0.0580 | 0.0372 | 0.1227 | 0.0567 | 0.0155 | 0.0001 |        | 0.0199 0.0302 |
| KT207826 | <i>Tegula lividomaculata</i>            | 2 | 0.0271 | 0.0305 | 1.1235 | 0.0019 | 0.0001 | 0.0010 | 0.0284 | 0.0124 | 0.0145 | 0.0118 | 0.0335 | 0.0166 | 0.0125 | 0.0300 |        | 0.0133 0.0388 |
| JN790613 | <i>Tegula brunnea</i>                   | 2 | 0.0219 | 0.0275 | 1.2550 | 0.0028 |        | 0.0023 | 0.0123 | 0.0254 | 0.0038 | 0.0069 | 0.0216 | 0.0674 | 0.0103 | 0.0103 |        | 0.0116 0.1442 |
| KT207824 | <i>Bolma rugosa</i>                     | 2 | 0.0106 | 0.0352 | 3.3135 | 0.0122 |        | 0.0001 | 0.0001 | 0.0077 | 0.0087 | 0.0130 | 0.0615 | 0.0474 | 0.0111 | 0.0080 |        | 0.0072 0.0090 |
| KR297248 | <i>Angaria neglecta</i>                 | 2 | 0.0320 | 0.0919 | 2.8676 | 0.0298 | 0.0371 | 0.0250 | 0.0864 | 0.0194 | 0.0223 | 0.0243 | 0.0928 | 0.1125 | 0.0366 | 0.1816 |        | 0.0302 0.0301 |

|          |                                 |   |        |        |        |        |        |        |        |        |        |        |        |        |        |        |        |        |
|----------|---------------------------------|---|--------|--------|--------|--------|--------|--------|--------|--------|--------|--------|--------|--------|--------|--------|--------|--------|
| KF700096 | <i>Lunella aff. cinerea</i>     | 2 | 0.0233 | 0.0560 | 2.4009 | 0.0159 | 0.0017 | 0.0013 | 0.0131 | 0.0101 | 0.0112 | 0.0130 | 0.0797 | 0.0304 | 0.0281 | 0.0726 | 0.0278 | 0.0343 |
| LC107880 | <i>Lepetodrilus nux</i>         | 2 | 0.0265 | 0.0130 | 0.4924 | 0.0145 | 0.0746 | 0.0001 | 0.1105 | 0.0726 | 0.0019 | 0.0109 | 0.0599 | 0.0281 | 0.0081 | 0.0052 | 0.0348 | 0.0954 |
| KR297250 | <i>Lepetodrilus schrolli</i>    | 2 | 0.0256 | 0.0105 | 0.4123 | 0.0041 | 0.0000 | 0.0050 | 0.0001 | 0.0001 | 0.0747 | 0.0146 | 0.0407 | 0.0556 | 0.0301 | 0.0000 | 0.0641 | 0.1321 |
| KR297249 | <i>Granata lyrata</i>           | 2 | 0.0648 | 0.1766 | 2.7250 | 0.3102 | 0.3240 | 0.0576 | 0.3394 | 0.2137 | 0.0418 | 0.1276 | 0.0997 | 0.0281 | 0.0481 | 0.0808 | 0.0950 | 0.0357 |
| KT207825 | <i>Diodora graeca</i>           | 2 | 0.0398 | 0.0969 | 2.4328 | 0.0327 | 0.1067 | 0.0294 | 0.0451 | 0.0410 | 0.0207 | 0.0470 | 0.0911 | 0.0013 | 0.0307 | 0.1205 | 0.1100 | 0.0416 |
| JN790612 | <i>Fissurella volcano</i>       | 2 | 0.0420 | 0.1134 | 2.7031 | 0.0518 | 0.3732 | 0.0169 | 0.0497 | 0.0425 | 0.0255 | 0.0515 | 0.0325 | 0.0579 | 0.0561 | 0.4582 | 0.0376 | 0.0387 |
| AP013032 | <i>Chrysomallon squamiferum</i> | 2 | 0.0524 | 0.1977 | 3.7773 | 0.0289 | 0.4727 | 0.0539 | 0.0014 | 0.0087 | 0.0304 | 0.0410 | 0.0809 | 0.0387 | 0.0627 | 0.0943 | 0.0360 | 0.0710 |
| KR297251 | <i>Phasianella solida</i>       | 2 | 0.0652 | 0.1566 | 2.4030 | 0.0424 | 0.0226 | 0.0260 | 0.1035 | 0.0551 | 0.0397 | 0.0440 | 0.1433 | 0.0823 | 0.0811 | 0.1158 | 0.0524 | 0.1556 |
| KF728890 | <i>Nerita versicolor</i>        | 2 | 0.0146 | 0.0083 | 0.5675 | 0.0091 | 0.0673 | 0.0027 | 0.0001 | 0.0062 | 0.0032 | 0.0168 | 0.0235 | 0.0105 | 0.0135 | 0.0001 | 0.0135 | 0.0344 |
| GU810158 | <i>Nerita melanotragus</i>      | 2 | 0.0134 | 0.0103 | 0.7677 | 0.0090 | 0.1872 | 0.0039 | 0.0147 | 0.0275 | 0.0135 | 0.0151 | 0.0136 | 0.0057 | 0.0220 | 0.0001 | 0.0123 | 0.0138 |
| KF728889 | <i>Nerita tessellata</i>        | 2 | 0.0242 | 0.0068 | 0.2813 | 0.0001 | 0.0000 | 0.0064 | 0.1347 | 0.0270 | 0.0166 | 0.0210 | 0.0099 | 0.0001 | 0.0044 | 0.0001 | 0.0218 | 0.0001 |
| KF728888 | <i>Nerita fulgurans</i>         | 2 | 0.0140 | 0.0033 | 0.2339 | 0.0186 | 0.0000 | 0.0001 | 0.0001 | 0.0400 | 0.0090 | 0.0075 | 0.0151 | 0.0305 | 0.0339 | 0.0207 | 0.0138 | 0.0194 |
| KF148053 | <i>Aplysia kurodai</i>          | 2 | 0.0021 | 0.0122 | 5.7484 | 0.1421 | 0.0001 | 0.0022 |        | 0.0193 | 0.0064 | 0.0467 | 0.0082 | 0.0844 | 0.0115 | 0.0000 | 0.0109 | 0.0170 |
| AY569552 | <i>Aplysia californica</i>      | 2 | 0.0247 | 0.0164 | 0.6652 | 0.0314 | 0.0001 | 0.0358 | 0.0193 | 0.0015 | 0.0163 | 0.1010 | 0.0110 | 0.0321 | 0.0030 | 0.0001 | 0.0270 | 0.0048 |
| DQ991927 | <i>Aplysia dactylomela</i>      | 2 | 0.0159 | 0.0074 | 0.4646 | 0.0031 | 0.0813 | 0.0001 | 0.0001 | 0.0046 | 0.0073 | 0.0782 | 0.0091 | 0.0644 | 0.0025 | 0.0088 | 0.0095 | 0.0171 |
| AY083457 | <i>Roboastra europaea</i>       | 2 | 0.0222 | 0.0859 | 3.8690 | 0.0295 | 0.0233 | 0.0074 | 0.0359 | 0.0234 | 0.0283 | 0.0310 | 0.0194 | 0.0801 | 0.0323 | 0.0163 | 0.0156 | 0.0926 |
| KP764764 | <i>Tritonia diomedea</i>        | 2 | 0.0145 | 0.0652 | 4.4814 | 0.0503 |        | 0.0069 | 0.0134 | 0.0161 | 0.0184 | 0.0118 | 0.0245 | 0.0421 | 0.0167 | 0.0045 | 0.0076 | 0.0033 |
| JN620539 | <i>Melibe leonina</i>           | 2 | 0.0262 | 0.0853 | 3.2520 | 0.0417 | 0.0001 | 0.0111 | 0.0186 | 0.0296 | 0.0263 | 0.0256 | 0.0695 | 0.0151 | 0.0162 | 0.0080 | 0.0315 | 0.0246 |
| JN627205 | <i>Salinator rhamphidia</i>     | 2 | 0.0343 | 0.1150 | 3.3562 | 0.0409 | 0.5129 | 0.0150 | 0.0396 | 0.0275 | 0.0230 | 0.0172 | 0.0560 | 0.0344 | 0.0341 | 0.0028 | 0.0278 | 0.0451 |
| AY345049 | <i>Siphonaria gigas</i>         | 2 | 0.0399 | 0.1275 | 3.1995 | 0.0195 | 0.2108 | 0.0168 | 0.0632 | 0.0265 | 0.0243 | 0.0198 | 0.0533 | 0.0489 | 0.0301 | 0.1057 | 0.0259 | 0.1330 |
| AY345022 | <i>Siphonaria pectinata</i>     | 2 | 0.0129 | 0.0870 | 6.7172 | 0.0113 | 0.3578 | 0.0047 | 0.0171 | 0.0132 | 0.0133 | 0.0103 | 0.0319 | 0.0206 | 0.0250 | 0.0135 | 0.0186 | 0.0109 |
| EU599581 | <i>Ascobulla fragilis</i>       | 2 | 0.0218 | 0.0989 | 4.5385 | 0.0616 | 0.0001 | 0.0119 | 0.0219 | 0.0224 | 0.0238 | 0.0147 | 0.0200 | 0.0272 | 0.0266 | 0.0934 | 0.0314 | 0.0212 |
| AY345048 | <i>Elysia chlorotica</i>        | 2 | 0.0420 | 0.1422 | 3.3861 | 0.0714 | 0.5180 | 0.0116 | 0.0270 | 0.0238 | 0.0462 | 0.0227 | 0.0889 | 0.0557 | 0.0662 | 0.0387 | 0.0689 | 0.0131 |
| JN632509 | <i>Onchidella celtica</i>       | 2 | 0.0330 | 0.1005 | 3.0401 | 0.0468 |        | 0.0141 | 0.0320 | 0.0287 | 0.0162 | 0.0266 | 0.0681 | 0.0394 | 0.0292 | 0.0934 | 0.0487 | 0.0612 |

|          |                                |   |        |        |        |        |        |        |        |        |        |        |        |        |        |        |        |        |
|----------|--------------------------------|---|--------|--------|--------|--------|--------|--------|--------|--------|--------|--------|--------|--------|--------|--------|--------|--------|
| JN632509 | <i>Trimusculus reticulatus</i> | 2 | 0.0252 | 0.0858 | 3.4001 | 0.0337 | 0.0034 | 0.0029 | 0.0158 | 0.0070 | 0.0318 | 0.0137 | 0.0252 | 0.0381 | 0.0349 | 0.0426 | 0.0390 | 0.0418 |
| AY345054 | <i>Pyramidella dolabrata</i>   | 2 | 0.0559 | 0.1996 | 3.5695 | 0.0462 |        | 0.0383 | 0.0398 | 0.0680 | 0.0439 | 0.0390 | 0.0563 | 0.0165 | 0.0747 | 0.0459 | 0.1135 | 0.1859 |
| AB028237 | <i>Pupa strigosa</i>           | 2 | 0.0509 | 0.1677 | 3.2946 | 0.0576 | 0.6721 | 0.0142 | 0.0607 | 0.0392 | 0.0392 | 0.0311 | 0.1004 | 0.0833 | 0.0333 | 0.1128 | 0.0676 | 0.0736 |
| DQ991933 | <i>Micromelo undata</i>        | 2 | 0.0143 | 0.0723 | 5.0582 | 0.0295 |        | 0.0065 | 0.0114 | 0.0468 | 0.0141 | 0.0004 | 0.0115 | 0.0584 | 0.0265 | 0.0116 | 0.0227 | 0.0234 |
| KP716634 | <i>Naticarius hebraeus</i>     | 2 | 0.0154 | 0.0665 | 4.3168 | 0.0266 | 0.0143 | 0.0070 | 0.0121 | 0.0371 | 0.0109 | 0.0153 | 0.0182 |        | 0.0187 |        | 0.0149 | 0.0174 |
| KM245630 | <i>Strombus gigas</i>          | 2 | 0.0246 | 0.0730 | 2.9715 | 0.0110 | 0.0019 | 0.0052 | 0.0215 | 0.0131 | 0.0135 | 0.0205 | 0.0357 | 0.0573 | 0.0366 | 0.0479 | 0.0205 | 0.0382 |
| KP716635 | <i>Galeodea echinophora</i>    | 2 | 0.0107 | 0.0371 | 3.4842 | 0.0217 |        | 0.0096 | 0.0158 | 0.0091 | 0.0127 | 0.0130 | 0.0016 | 0.0243 | 0.0127 | 0.0042 | 0.0051 | 0.0523 |
| EU827200 | <i>Cymatium parthenopeum</i>   | 2 | 0.0132 | 0.0405 | 3.0814 | 0.0194 |        | 0.0033 | 0.0037 | 0.0145 | 0.0138 | 0.0146 | 0.0273 | 0.0088 | 0.0102 | 0.0223 | 0.0224 | 0.0327 |
| HM174254 | <i>Eualetes tulipa</i>         | 2 | 0.0472 | 0.1539 | 3.2626 | 0.0275 | 0.0025 | 0.0122 | 0.0747 | 0.0225 | 0.0215 | 0.0283 | 0.0253 | 0.0301 | 0.0763 | 0.0644 | 0.0744 | 0.0831 |
| HM174253 | <i>Dendropoma maximum</i>      | 2 | 0.0429 | 0.1340 | 3.1244 | 0.0249 | 0.0904 | 0.0042 | 0.0279 | 0.0007 | 0.0156 | 0.0633 | 0.1218 | 0.0218 | 0.0719 | 2.4020 | 0.0650 | 0.0458 |
| HM174252 | <i>Dendropoma gregarium</i>    | 2 | 0.0569 | 0.1807 | 3.1755 | 0.0318 | 0.0634 | 0.0157 | 0.0427 | 0.0001 | 0.0566 | 0.0524 | 0.0741 | 0.1065 | 0.0944 | 0.0646 | 0.0630 | 0.1697 |
| HM174255 | <i>Thylacodes squamigerus</i>  | 2 | 0.0495 | 0.1344 | 2.7152 | 0.0276 | 0.2600 | 0.0087 | 0.0620 | 0.0244 | 0.0213 | 0.0295 | 0.0897 | 0.0353 | 0.1046 | 0.0640 | 0.0844 | 0.0839 |
| KT962044 | <i>Buccinum pemphigus</i>      | 2 | 0.0145 | 0.0072 | 0.4987 | 0.0145 | 0.0784 | 0.0050 | 0.0198 | 0.0340 | 0.0032 | 0.0283 | 0.0143 | 0.0281 | 0.0187 | 0.0001 | 0.0826 |        |
| KF897830 | <i>Babylonia lutosa</i>        | 2 | 0.0746 | 0.0164 | 0.2199 | 0.0100 | 0.0789 | 0.0183 | 0.0001 | 0.0001 | 0.0057 | 0.0841 |        |        | 0.0063 | 0.0000 | 0.0166 |        |
| HQ416443 | <i>Babylonia areolata</i>      | 2 | 0.0669 | 0.0120 | 0.1790 | 0.0892 | 0.0323 | 0.0000 | 0.0729 | 0.0001 | 0.0315 | 0.0229 |        | 0.2010 |        | 0.0001 | 0.0624 |        |
| KT382829 | <i>Volutharpa perryi</i>       | 2 | 0.0172 | 0.0051 | 0.2932 | 0.0001 | 0.1818 | 0.0020 | 0.0053 | 0.0052 | 0.0059 | 0.0018 | 0.1619 | 0.0774 | 0.0432 | 0.0000 | 0.0097 | 0.0063 |
| KM603509 | <i>Varicinassa variciferus</i> | 2 | 0.0122 | 0.0106 | 0.8709 | 0.0001 | 0.0001 | 0.0118 | 0.0056 | 0.0024 | 0.0149 | 0.0138 | 0.0169 | 0.0100 | 0.0070 | 0.0210 | 0.0131 | 0.0205 |
| EU827201 | <i>Nassarius reticulatus</i>   | 2 | 0.0126 | 0.0091 | 0.7235 | 0.0171 | 0.0001 | 0.0019 | 0.0022 |        | 0.0165 | 0.0040 | 0.0253 | 0.0175 | 0.0038 | 0.0001 | 0.0128 | 0.0335 |
| EU827195 | <i>Cancellaria cancellata</i>  | 2 | 0.0313 | 0.0971 | 3.1044 | 0.0244 | 0.1435 | 0.0183 |        | 0.0323 | 0.0132 | 0.0307 | 0.0528 | 0.0287 | 0.0303 | 0.0442 | 0.0261 | 0.0190 |
| KT199301 | <i>Conus tribblei</i>          | 2 | 0.0203 | 0.0136 | 0.6687 | 0.0116 | 0.1044 | 0.0062 | 0.0039 | 0.0051 | 0.0135 | 0.0055 | 0.0573 | 0.0338 | 0.0187 | 0.0497 | 0.0329 | 0.0372 |
| KR006970 | <i>Conus tulipa</i>            | 2 | 0.0204 | 0.0175 | 0.8576 | 0.0184 | 0.0133 | 0.0001 | 0.0073 | 0.0113 | 0.0051 | 0.0086 | 0.0434 | 0.0240 | 0.0422 | 0.0045 | 0.0282 | 0.0508 |
| DQ862058 | <i>Conus textile</i>           | 2 | 0.0259 | 0.0183 | 0.7072 | 0.0159 | 0.1116 | 0.0013 | 0.0039 | 0.0089 | 0.0109 | 0.0234 | 0.0744 | 0.0385 | 0.0365 | 0.0396 | 0.0190 | 0.0569 |
| KF887950 | <i>Conus consors</i>           | 2 | 0.0167 | 0.0132 | 0.7876 | 0.0219 | 0.2762 | 0.0027 | 0.0001 | 0.0084 | 0.0046 | 0.0049 | 0.0374 | 0.0084 | 0.0250 | 0.0117 | 0.0168 | 0.0184 |
| EU827198 | <i>Conus borgesi</i>           | 2 | 0.0449 | 0.0196 | 0.4358 | 0.0604 | 0.0282 | 0.0074 | 0.0136 | 0.0761 | 0.0289 | 0.0283 | 0.0799 | 0.0055 | 0.0528 | 0.1005 | 0.0692 | 0.0540 |



|          |                                    |   |        |        |         |        |        |        |        |        |        |        |        |        |        |        |        |        |
|----------|------------------------------------|---|--------|--------|---------|--------|--------|--------|--------|--------|--------|--------|--------|--------|--------|--------|--------|--------|
| EU827197 | <i>Fusiturris similis</i>          | 2 | 0.0227 | 0.0518 | 2.2818  | 0.0488 | 0.1324 | 0.0142 | 0.0190 | 0.0207 | 0.0237 | 0.0125 | 0.0348 | 0.0739 | 0.0226 | 0.0488 | 0.0342 | 0.0310 |
| DQ284754 | <i>Lophiotoma cerithiformis</i>    | 2 | 0.0134 | 0.0371 | 2.7631  | 0.0166 | 0.0477 | 0.0093 | 0.0146 | 0.0144 | 0.0023 | 0.0155 | 0.0131 | 0.0217 | 0.0138 | 0.0055 | 0.1429 | 0.0144 |
| EU827196 | <i>Terebra dimidiata</i>           | 2 | 0.0195 | 0.0549 | 2.8100  | 0.0149 | 0.0129 | 0.0113 | 0.0125 | 0.0069 | 0.0051 | 0.0130 | 0.0342 | 0.0164 | 0.0245 |        | 0.0291 | 0.0139 |
| KM213962 | <i>Rapana venosa</i>               | 2 | 0.0076 | 0.0108 | 1.4314  | 0.0064 | 0.0001 | 0.0001 | 0.0001 | 0.0082 | 0.0031 | 0.0067 | 0.0096 | 0.0468 | 0.0058 | 0.0402 | 0.0106 | 0.0183 |
| JQ446041 | <i>Concholepas concholepas</i>     | 2 | 0.0696 | 0.1076 | 1.5462  | 0.0125 | 0.0102 | 0.0038 | 0.0018 | 0.5936 | 0.0157 | 0.0285 | 0.3261 | 0.0069 | 0.0078 | 0.0213 | 0.0228 | 0.0229 |
| DQ159954 | <i>Reishia clavigera</i>           | 2 | 0.0181 | 0.0165 | 0.9085  | 0.0142 | 0.0000 | 0.0001 | 0.0442 | 0.0109 | 0.0072 | 0.0428 | 0.0496 | 0.0072 | 0.0114 | 0.0001 | 0.0119 | 0.0150 |
| EU827194 | <i>Bolinus brandaris</i>           | 2 | 0.0157 | 0.0464 | 2.9547  | 0.0203 | 0.0968 | 0.0019 | 0.0078 | 0.0122 | 0.0067 | 0.0110 | 0.0265 | 0.0362 | 0.0193 | 0.0187 | 0.0220 | 0.0218 |
| EU827199 | <i>Cymbium olla</i>                | 2 | 0.0328 | 0.1009 | 3.0778  | 0.0331 | 0.1634 | 0.0102 | 0.0364 | 0.0385 | 0.0277 | 0.0288 | 0.0334 | 0.0566 | 0.0353 | 0.2984 | 0.0396 | 0.0707 |
| GU196685 | <i>Amalda northlandica</i>         | 2 | 0.0165 | 0.0469 | 2.8367  | 0.0105 | 0.0166 | 0.0076 | 0.0128 | 0.0140 | 0.0165 | 0.0132 | 0.0197 | 0.0100 | 0.0171 | 0.0040 | 0.0270 | 0.0139 |
| KU221394 | <i>Turritella bacillum</i>         | 2 | 0.0257 | 0.0709 | 2.7585  | 0.0143 |        | 0.0031 | 0.0283 | 0.0163 | 0.0265 | 0.0273 | 0.0436 | 0.0873 | 0.0381 | 0.0081 | 0.0221 | 0.0151 |
| KF736848 | <i>Semisulcospira libertina</i>    | 2 | 0.0171 | 0.0595 | 3.4876  | 0.0112 | 0.5080 | 0.0015 | 0.0079 | 0.0768 | 0.0101 | 0.0007 | 0.0227 | 0.0343 | 0.0165 | 0.0579 | 0.0236 | 0.0629 |
| KC757644 | <i>Ifremeria nautilei</i>          | 2 | 0.0334 | 0.0856 | 2.5622  | 0.0038 | 0.0787 | 0.0147 | 0.0337 | 0.0525 | 0.0190 | 0.0537 | 0.0626 | 0.0665 | 0.0457 | 0.0361 | 0.0338 | 0.0273 |
| DQ238599 | <i>Lottia digitalis</i>            | 2 | 0.2091 | 0.6499 | 3.1087  | 0.2575 | 0.2712 | 0.1423 | 0.3115 | 0.5720 | 0.1460 | 0.1507 | 0.2453 | 0.1121 | 0.2850 | 0.2203 | 0.2316 | 0.3496 |
| JN564796 | <i>Galba pervia</i>                | 2 | 0.0028 | 0.0295 | 10.5760 | 0.0232 | 0.7279 | 0.0035 | 0.0275 | 0.0209 | 0.0038 | 0.0316 | 0.0026 | 0.0153 | 0.0063 | 0.0834 | 0.0317 | 0.0529 |
| KP098541 | <i>Radix balthica</i>              | 2 | 0.0099 | 0.0565 | 5.7304  | 0.0261 | 0.0018 | 0.0016 | 0.0554 | 0.0013 | 0.0191 | 0.0014 | 0.0162 | 0.0154 | 0.0092 | 0.2399 | 0.0109 | 0.0542 |
| KP098540 | <i>Radix auricularia</i>           | 2 | 0.0079 | 0.0483 | 6.0774  | 0.0552 | 0.1504 | 0.0030 | 0.0345 | 0.0018 | 0.0162 | 0.0188 | 0.0095 | 0.0790 | 0.0040 | 0.0848 | 0.0895 | 0.0143 |
| KP279638 | <i>Radix swinhoei</i>              | 2 | 0.0539 | 0.0161 | 0.2982  | 0.0347 | 0.0001 | 0.0029 | 0.0744 | 0.2716 | 0.0266 | 0.0758 | 0.0967 | 0.0001 | 0.0422 | 0.0479 | 0.0158 | 0.2097 |
| JQ390526 | <i>Physella acuta</i>              | 2 | 0.1404 | 0.0192 | 0.1365  |        | 0.0000 | 0.0000 | 0.0666 | 0.0382 | 0.1004 | 0.1364 |        | 0.1584 |        | 0.7189 |        | 0.0708 |
| KP279639 | <i>Planorbarius corneus</i>        | 2 | 0.0159 | 0.1078 | 6.7784  | 0.0373 | 0.0001 | 0.0041 | 0.0154 | 0.0244 | 0.0198 | 0.0064 | 0.1290 | 0.0993 | 0.0245 | 0.0547 | 0.0310 | 0.0462 |
| AY380567 | <i>Biomphalaria glabrata</i>       | 2 | 0.0409 | 0.0283 | 0.6927  | 0.0030 | 0.0000 | 0.0007 | 0.0226 | 0.0104 | 0.0095 |        | 0.0900 | 0.0503 | 0.0583 | 0.0323 | 0.0960 | 0.0579 |
| EF433576 | <i>Biomphalaria tenagophila</i>    | 2 | 0.0363 | 0.0298 | 0.8192  | 0.0022 | 0.0001 |        |        | 0.0177 |        | 0.0122 | 0.0671 | 0.1516 | 0.0819 |        | 0.0210 |        |
| KM503121 | <i>Cipangopaliduna cathayensis</i> | 2 | 0.0372 | 0.1739 | 4.6744  | 0.0086 | 0.2096 | 0.0161 | 0.0692 | 0.0318 | 0.0400 | 0.0363 | 0.0468 | 0.0511 | 0.0425 | 0.1079 | 0.0215 | 0.0597 |
| KM100140 | <i>Marisa cornuarietis</i>         | 2 | 0.0561 | 0.0518 | 0.9234  | 0.5505 | 0.3996 | 0.0073 | 0.0484 | 0.0466 | 0.0529 | 0.0425 | 0.1419 | 0.0318 | 0.0419 | 0.0065 | 0.0223 | 0.0186 |
| KJ739609 | <i>Pomacea canaliculata</i>        | 2 | 0.0442 | 0.0115 | 0.2600  | 0.0303 | 0.3276 | 0.0070 | 0.0258 | 0.0074 | 0.0204 | 0.0455 | 0.0883 |        | 0.0865 | 0.0413 | 0.4199 |        |

|           |                                        |   |        |        |        |        |        |        |        |        |        |        |        |        |        |        |        |        |
|-----------|----------------------------------------|---|--------|--------|--------|--------|--------|--------|--------|--------|--------|--------|--------|--------|--------|--------|--------|--------|
| KR350466  | <i>Pomacea maculata</i>                | 2 | 0.0334 | 0.0133 | 0.3985 | 0.0392 | 0.0001 | 0.0052 | 0.0254 | 0.0074 | 0.0763 | 0.0198 | 0.0551 | 0.0013 | 0.0369 | 0.0100 | 0.0325 | 0.0140 |
| EU079378  | <i>Oncomelania hupensis robertsoni</i> | 2 | 0.0249 | 0.0093 | 0.3746 | 0.0771 | 0.0620 | 0.0001 | 0.0258 | 0.0100 | 0.0071 | 0.0305 | 0.0431 | 0.0641 | 0.0241 | 0.1918 | 0.0498 |        |
| EU001660  | <i>Oncomelania hupensis hupensis</i>   | 2 | 0.0132 | 0.0012 | 0.0876 | 0.0230 | 0.0000 | 0.0001 | 0.0001 | 0.0000 | 0.0001 | 0.0001 | 0.0576 | 0.0000 | 0.0200 | 0.0001 | 0.0257 | 0.0432 |
| FJ997214  | <i>Oncomelania hupensis</i>            | 2 | 0.0551 | 0.0031 | 0.0561 | 0.0001 | 0.3522 | 0.0267 |        | 0.0304 | 0.0001 | 0.0001 | 0.0486 | 0.0001 | 0.0537 | 0.0632 | 0.0419 | 0.2286 |
| EU440735  | <i>Tricula hortensis</i>               | 2 | 0.0231 | 0.0249 | 1.0765 | 0.0146 |        | 0.0097 | 0.0387 | 0.1217 | 0.0258 | 0.0513 | 0.3559 | 0.0269 | 0.0261 | 0.0271 | 0.0144 | 0.0034 |
| GQ996415  | <i>Potamopyrgus estuarinus</i>         | 2 | 0.0110 | 0.0040 | 0.3637 | 0.0038 | 0.0000 | 0.0094 |        | 0.0036 | 0.0075 | 0.0001 | 0.0205 |        | 0.0110 | 0.0001 | 0.0123 |        |
| GQ996430  | <i>Potamopyrgus antipodarum</i>        | 2 | 0.0159 | 0.0054 | 0.3404 | 0.0550 | 0.0001 | 0.0001 | 0.0029 | 0.0001 | 0.0050 | 0.0088 | 0.0371 | 0.0225 | 0.0230 | 0.1523 | 0.0119 | 0.0074 |
| KM365085  | <i>Cerion incanum</i>                  | 2 | 0.0680 | 0.2721 | 4.0010 | 0.0544 | 0.4597 | 0.0346 | 0.0532 | 0.0405 | 0.0323 | 0.1188 | 0.1441 | 0.0524 | 0.0796 | 0.1372 | 0.1057 | 0.0064 |
| KJ744205  | <i>Achatina fulica</i>                 | 2 | 0.0808 | 0.2445 | 3.0275 | 0.0458 | 0.0195 | 0.0207 | 0.0881 | 0.0505 | 0.0718 | 0.0615 | 0.0937 | 0.1177 | 0.1150 | 0.3460 | 0.0729 | 0.3938 |
| KM083123  | <i>Mastigeulota kiangsinensis</i>      | 2 | 0.0261 | 0.1118 | 4.2846 | 0.0313 | 0.1809 | 0.0026 |        | 0.0175 | 0.0290 | 0.0181 | 0.0528 | 0.0373 | 0.0343 | 0.0001 | 0.0298 | 0.1712 |
| KR338956  | <i>Dolicheulota formosensis</i>        | 2 | 0.0241 | 0.1246 | 5.1828 | 0.0553 |        | 0.0018 | 0.0114 | 0.0238 | 0.0299 | 0.0153 | 0.0182 | 0.0260 | 0.0146 | 0.0524 | 0.0313 | 0.0799 |
| KT192071  | <i>Aegista aubryana</i>                | 2 | 0.0517 | 0.0387 | 0.7483 | 0.1667 | 0.0060 |        | 0.0176 | 0.0545 | 0.0306 | 0.0145 | 0.0520 | 0.0194 | 0.0559 | 0.0886 | 0.0477 |        |
| KR002567  | <i>Aegista diversifamilia</i>          | 2 | 0.0405 | 0.0495 | 1.2220 | 0.0444 |        | 0.0012 | 0.0439 | 0.0283 | 0.0509 | 0.0557 | 0.1695 | 0.0873 | 0.0414 | 0.1120 | 0.0463 | 0.0371 |
| JQ417194  | <i>Helix aspersa</i>                   | 2 | 0.0222 | 0.1473 | 6.6295 | 0.0283 | 0.1195 | 0.0026 | 0.0173 | 0.0214 | 0.0118 | 0.0174 | 0.0347 | 0.0236 | 0.0195 | 7.0330 | 0.0252 | 0.0284 |
| JN107636  | <i>Cylindrus obtusus</i>               | 2 | 0.0521 | 0.1602 | 3.0776 | 0.1160 | 0.2100 | 0.0104 | 0.0310 | 0.0163 | 0.0405 | 0.0557 | 0.0293 | 0.0714 | 0.0658 | 0.0965 | 0.0587 | 0.1601 |
| KM365408  | <i>Camaena cicatricosa</i>             | 2 | 0.0309 | 0.1667 | 5.4030 | 0.0318 |        | 0.0068 | 0.0234 | 0.0192 | 0.0376 | 0.0196 | 0.0378 | 0.0912 | 0.0235 | 0.1490 | 0.0445 | 0.0001 |
| JN627206  | <i>Succinea putris</i>                 | 2 | 0.0346 | 0.2196 | 6.3444 | 0.0573 |        | 0.0150 | 0.0115 | 0.0606 | 0.0297 | 0.0374 | 0.0289 | 0.0653 | 0.0158 | 0.0204 | 0.0338 | 0.0831 |
| KT821554  | <i>Naesiotus nux</i>                   | 2 | 0.0322 | 0.2073 | 6.4437 | 0.0542 | 0.7414 | 0.0114 | 0.0260 | 0.0159 | 0.0360 | 0.0250 | 0.0359 | 0.0785 | 0.0338 | 0.0429 | 0.0315 | 0.2589 |
| NC_001761 | <i>Albinaria caerulea</i>              | 2 | 0.0320 | 0.1927 | 6.0285 | 0.0555 | 0.5764 | 0.0204 | 0.0157 | 0.0079 | 0.0520 | 0.0282 | 0.0210 | 0.0001 | 0.0352 | 0.0648 | 0.0472 | 0.1069 |
| KC185405  | <i>Vertigo pusilla</i>                 | 2 | 0.0219 | 0.1344 | 6.1309 | 0.0295 |        | 0.0028 | 0.0108 | 0.0208 | 0.0144 | 0.0292 | 0.0268 | 0.0140 | 0.0277 | 0.0242 | 0.0361 | 0.2774 |
| KC185404  | <i>Pupilla muscorum</i>                | 2 | 0.0240 | 0.1213 | 5.0586 | 0.0404 |        | 0.0032 | 0.0254 | 0.0281 | 0.0307 | 0.0116 | 0.0518 | 0.0334 | 0.0354 | 0.0447 | 0.0353 | 0.2856 |
| KC185403  | <i>Gastrocopta cristata</i>            | 2 | 0.0247 | 0.1131 | 4.5873 | 0.0169 | 0.2923 | 0.0058 | 0.0072 | 0.0151 | 0.0368 | 0.0225 | 0.0312 | 0.0353 | 0.0315 | 0.0478 | 0.0406 | 0.0643 |
| GU475132  | <i>Platevindex mortoni</i>             | 2 | 0.0161 | 0.0696 | 4.3287 | 0.0137 |        | 0.0033 | 0.0087 | 0.0100 | 0.0075 | 0.0082 | 0.0049 | 0.5115 | 0.0093 | 0.0138 | 0.0174 | 0.0038 |
| JN619346  | <i>Peronia peronii</i>                 | 2 | 0.0123 | 0.0549 | 4.4618 | 0.0118 | 0.6669 | 0.0038 | 0.0001 | 0.0103 | 0.0124 | 0.0091 | 0.0061 | 0.0764 | 0.0149 | 0.0042 | 0.0198 | 0.0213 |

|          |                                  |   |           |        |        |        |        |        |        |        |        |        |        |        |        |        |        |        |
|----------|----------------------------------|---|-----------|--------|--------|--------|--------|--------|--------|--------|--------|--------|--------|--------|--------|--------|--------|--------|
| JN619347 | <i>Rhopalocaulis grandidieri</i> | 2 | 0.1031    | 0.2936 | 2.8464 | 0.1129 | 0.0166 | 0.0471 | 0.1030 | 0.1081 | 0.0782 | 0.1278 | 0.1139 | 0.1721 | 0.0771 | 0.1588 | 0.1444 | 0.1910 |
| JN615140 | <i>Pedipes pedipes</i>           | 2 | 0.0700    | 0.1999 | 2.8554 | 0.0509 | 0.8395 | 0.0178 | 0.0820 | 0.0405 | 0.0511 | 0.0630 | 0.1117 | 0.0847 | 0.0904 | 0.1328 | 0.0817 | 0.1238 |
| JN615139 | <i>Ovatella vulcani</i>          | 2 | 0.0497    | 0.1252 | 2.5196 | 0.0165 | 0.0001 | 0.0024 | 0.0419 | 0.0309 | 0.0385 | 0.0340 | 0.0882 | 0.0637 | 0.0670 | 0.1662 | 0.0609 | 0.0970 |
| JN606067 | <i>Myosotella myosotis</i>       | 2 | 0.0866    | 0.2615 | 3.0181 | 0.1228 | 0.0122 | 0.0279 | 0.0477 | 0.0898 | 0.0953 | 0.0472 | 0.0885 | 0.0266 | 0.1220 | 0.1792 | 0.0687 | 0.0065 |
| AP013073 | <i>Sepia apama</i>               | 3 | 0.0264    | 0.0286 | 1.0854 |        |        | 0.0024 | 0.0182 | 0.0117 | 0.0166 |        | 0.0106 | 0.0129 | 0.0341 | 0.0926 | 0.0234 | 0.0123 |
| AB266516 | <i>Sepia esculenta</i>           | 3 | 0.0234    | 0.0289 | 1.2360 | 0.0199 |        | 0.0027 | 0.0245 | 0.0259 | 0.0168 | 0.0309 | 0.0415 | 0.0068 | 0.0166 | 0.0203 | 0.0236 | 0.0418 |
| AP013074 | <i>Sepia latimanus</i>           | 3 | 0.0254    | 0.0370 | 1.4577 | 0.0098 | 0.0784 | 0.0039 | 0.0136 | 0.0156 | 0.0175 | 0.0107 | 0.0220 | 0.0403 | 0.0283 | 0.0600 | 0.0195 | 0.0247 |
| KJ162574 | <i>Sepia lycidas</i>             | 3 | 0.0239    | 0.0215 | 0.8994 | 0.0596 | 0.0558 | 0.0018 | 0.0144 | 0.0241 | 0.0151 | 0.0285 | 0.0473 | 0.0161 | 0.0214 | 0.0600 | 0.0148 | 0.0131 |
| AB240155 | <i>Sepia officinalis</i>         | 3 | 0.0196    | 0.0214 | 1.0919 | 0.0098 | 0.0151 | 0.0017 | 0.0023 | 0.0200 | 0.0108 | 0.0255 | 0.0142 | 0.0264 | 0.0328 | 0.0064 | 0.0226 | 0.0395 |
| KC632521 | <i>Sepia pharaonis</i>           | 3 | 0.0198    | 0.0187 | 0.9482 | 0.0128 | 0.0926 | 0.0008 | 0.0172 | 0.0104 | 0.0090 | 0.0234 | 0.0740 | 0.0390 | 0.0159 |        | 0.0136 | 0.0053 |
| KF690633 | <i>Sepia aculeata</i>            | 3 | 0.0241    | 0.0230 | 0.9549 | 0.0212 | 0.0206 | 0.0001 | 0.0105 | 0.0116 | 0.0038 | 0.0078 | 0.0356 | 0.0187 | 0.0167 | 0.0107 | 0.0268 | 0.0126 |
| KF040369 | <i>Sepiella inermis</i>          | 3 | 0.0185    | 0.0049 | 0.2646 | 0.0115 | 0.0903 | 0.0036 | 0.0053 | 0.3012 | 0.0185 | 0.0240 | 0.0131 | 0.0001 | 0.0122 | 0.0000 | 0.0579 | 0.0345 |
| AB675082 | <i>Sepiella japonica</i>         | 3 | N*dN < 20 | 0.0006 | 0.0093 | 0.0001 | 0.0000 | 0.0001 | 0.0001 | 0.0001 | 0.0001 | 0.0000 | 0.0001 | 0.0000 |        | 0.0000 | 0.0001 | 0.0000 |
| KR912215 | <i>Sepiella maindroni</i>        | 3 | N*dN < 20 | 0.0007 | 0.0071 | 0.0001 | 0.0000 | 0.0001 | 0.0000 | 0.0001 | 0.0001 | 0.0001 | 0.0000 | 0.0000 | 0.0001 | 0.0000 | 0.3268 | 0.0000 |
| KF647895 | <i>Idiosepius</i> sp.            | 3 | 0.0074    | 0.0625 | 2.3742 | 0.0092 | 0.2218 | 0.0034 | 0.0003 | 0.0402 | 0.0091 | 0.0134 | 0.0141 | 0.0065 | 0.0146 | 0.0484 | 0.0162 | 0.0135 |
| AP012226 | <i>Semirossia patagonica</i>     | 3 | 0.0290    | 0.0552 | 1.9028 | 0.0466 | 0.2693 | 0.0079 |        | 0.0454 | 0.0177 | 0.0201 | 0.0271 | 0.0621 | 0.0111 | 0.1341 | 0.0288 | 0.0163 |
| GQ225110 | <i>Loligo opalescens</i>         | 3 | N*dN < 20 | 0.0010 | 0.0000 |        |        |        |        |        |        |        |        |        |        |        |        |        |
| AB029616 | <i>Loligo bleekeri</i>           | 3 | 0.0258    | 0.0256 | 0.9943 | 0.0098 | 0.0096 | 0.0286 | 0.0051 | 0.0427 | 0.0035 | 0.0042 | 0.0615 | 0.0132 | 0.0171 | 0.0058 | 0.0124 | 0.0093 |
| KM878671 | <i>Sepioteuthis lessoniana</i>   | 3 | 0.0187    | 0.0382 | 2.0472 | 0.0037 | 0.0594 | 0.0020 | 0.0056 | 0.0109 | 0.0013 | 0.0075 | 0.0073 | 0.0139 | 0.0254 | 0.0098 | 0.0173 | 0.0159 |
| KP336703 | <i>Doryteuthis opalescens</i>    | 3 | N*dN < 20 | 0.0010 | 0.0000 |        |        |        |        |        |        |        |        |        |        |        |        |        |
| KT254309 | <i>Loliolus beka</i>             | 3 | 0.0140    | 0.0051 | 0.3672 | 0.0048 | 0.0205 | 0.0001 | 0.0001 | 0.0181 | 0.0104 |        | 0.0242 | 0.0037 | 0.0224 | 0.0001 | 0.0138 |        |
| KP265013 | <i>Loliolus uyii</i>             | 3 | 0.0119    | 0.0059 | 0.4987 | 0.0001 | 0.1403 | 0.0001 | 0.0185 | 0.0096 | 0.0030 | 0.0002 | 0.0280 | 0.0001 | 0.0066 | 0.0277 | 0.0091 |        |
| KT362380 | <i>Uroteuthis chinensis</i>      | 3 | 0.0122    | 0.0087 | 0.7190 | 0.0132 | 0.0344 | 0.0001 | 0.0071 | 0.0140 | 0.0048 | 0.0044 | 0.0129 | 0.0001 | 0.0137 | 0.0200 | 0.0060 | 0.0110 |
| KR051264 | <i>Uroteuthis duvaucelii</i>     | 3 | 0.0126    | 0.0122 | 0.9679 | 0.0065 | 0.0303 | 0.0008 | 0.0048 | 0.0084 | 0.0027 | 0.0073 | 0.0313 | 0.0090 | 0.0208 | 0.0307 | 0.0156 | 0.0017 |

|          |                                   |   |        |        |        |        |        |        |        |        |        |        |        |        |        |        |        |        |
|----------|-----------------------------------|---|--------|--------|--------|--------|--------|--------|--------|--------|--------|--------|--------|--------|--------|--------|--------|--------|
| AB675080 | <i>Uroteuthis edulis</i>          | 3 | 0.0178 | 0.0068 | 0.6951 | 0.0091 | 0.0001 | 0.0001 | 0.0092 | 0.0173 | 0.0017 | 0.0071 | 0.0262 | 0.0113 | 0.0112 | 0.0001 | 0.0114 | 0.0067 |
| KC701763 | <i>Architeuthis dux</i>           | 3 | 0.0223 | 0.0212 | 0.9529 | 0.0220 | 0.1035 | 0.0008 | 0.0051 | 0.0084 | 0.0101 | 0.0187 | 0.0227 | 0.0120 | 0.0464 | 0.0071 | 0.0183 | 0.0254 |
| AP012225 | <i>Bathyteuthis abyssicola</i>    | 3 | 0.0296 | 0.0354 | 1.1978 | 0.0275 | 0.0000 | 0.0048 | 0.0249 | 0.0117 | 0.0168 | 0.0204 | 0.0185 | 0.0889 | 0.0412 | 0.0019 | 0.0288 | 0.0104 |
| KJ845633 | <i>Watasenia scintillans</i>      | 3 | 0.0267 | 0.0605 | 2.2626 | 0.0203 | 0.0528 | 0.0040 | 0.0086 | 0.0107 | 0.0096 | 0.0053 | 0.0294 | 0.0125 | 0.0334 | 0.0415 | 0.0117 | 0.0132 |
| AB715401 | <i>Ommastrephes bartramii</i>     | 3 | 0.0146 | 0.0171 | 1.1667 | 0.0179 |        | 0.0001 | 0.0082 | 0.0001 | 0.0011 | 0.0099 | 0.0181 | 0.0137 | 0.0280 | 0.0096 | 0.0093 | 0.0064 |
| EU068697 | <i>Dosidicus gigas</i>            | 3 | 0.0139 | 0.0084 | 0.6065 | 0.0001 | 0.0001 | 0.0018 | 0.0123 | 0.0136 | 0.0070 | 0.0063 | 0.0235 | 0.0061 | 0.0272 | 0.0161 | 0.0106 | 0.0077 |
| EU660576 | <i>Sthenoteuthis oualaniensis</i> | 3 | 0.0074 | 0.0074 | 0.9989 | 0.0117 | 0.0084 | 0.0001 | 0.0001 | 0.0001 | 0.0007 | 0.0016 | 0.0173 | 0.0237 | 0.0098 | 0.0150 | 0.0070 | 0.0090 |
| AB240153 | <i>Todarodes pacificus</i>        | 3 | 0.0249 | 0.0120 | 2.2626 | 0.0346 | 0.0635 | 0.0059 | 0.0086 | 0.0344 | 0.0040 | 0.0025 | 0.0092 | 0.0179 | 0.0210 | 0.0070 | 0.0085 | 0.0001 |
| KP336702 | <i>Illex argentinus</i>           | 3 | 0.0169 | 0.0120 | 0.7055 | 0.1533 | 0.0205 | 0.0130 | 0.0027 | 0.0373 | 0.0016 | 0.0013 | 0.0086 | 0.0258 | 0.0201 | 0.0001 | 0.0098 | 0.0080 |
| KT428877 | <i>Amphioctopus aegina</i>        | 3 | 0.0360 | 0.0279 | 0.7762 | 0.0215 | 0.0152 | 0.0001 | 0.0094 | 0.0094 | 0.0263 | 0.0225 | 0.0327 | 0.0115 | 0.0443 | 0.0527 | 0.0302 | 0.0167 |
| AB240156 | <i>Amphioctopus fangsiao</i>      | 3 | 0.0309 | 0.0263 | 0.8500 | 0.0046 | 0.0001 | 0.0019 | 0.0149 | 0.0127 | 0.0140 | 0.0252 | 0.1044 | 0.0116 | 0.0237 | 0.0041 | 0.0184 | 0.0837 |
| KF017606 | <i>Cistopus chinensis</i>         | 3 | 0.0402 | 0.0228 | 0.5665 | 0.0455 | 0.2468 | 0.0069 | 0.0384 | 0.0172 | 0.0121 | 0.0254 | 0.0774 | 0.0748 | 0.0431 | 0.0637 | 0.0362 | 0.0067 |
| KF017605 | <i>Cistopus taiwanicus</i>        | 3 | 0.0278 | 0.0183 | 0.6570 | 0.0093 | 0.0718 | 0.0032 | 0.0106 | 0.0193 | 0.0085 | 0.0182 | 0.0972 | 0.0512 | 0.0349 | 0.0082 | 0.0427 | 0.0171 |
| KT581981 | <i>Octopus bimaculatus</i>        | 3 | 0.0426 | 0.0323 | 0.7576 | 0.0676 | 0.0094 | 0.0302 | 0.0036 | 0.0056 | 0.0179 | 0.0153 | 0.0950 | 0.0181 | 0.0658 | 0.0217 | 0.0426 |        |
| KJ789854 | <i>Octopus conispadiceus</i>      | 3 | 0.0228 | 0.0387 | 1.6976 | 0.0222 | 0.0812 | 0.0042 | 0.0088 | 0.0216 | 0.0226 | 0.0104 | 0.0238 | 0.0025 | 0.0234 | 0.0166 | 0.0266 | 0.0068 |
| HQ638215 | <i>Octopus minor</i>              | 3 | 0.0238 | 0.0391 | 1.6426 | 0.0239 | 0.0135 | 0.0024 | 0.0204 | 0.0147 | 0.0120 |        | 0.0310 | 0.0858 | 0.0286 | 0.0569 | 0.0052 | 0.0010 |
| AB158363 | <i>Octopus vulgaris</i>           | 3 | 0.0269 | 0.0204 | 0.7577 | 0.0089 | 0.0405 | 0.0039 | 0.0042 | 0.0027 | 0.0164 | 0.0243 | 0.0278 | 0.0122 | 0.0155 | 0.0131 | 0.0402 | 0.0130 |
| AB266515 | <i>Vampyroteuthis infernalis</i>  | 3 | 0.0122 | 0.0324 | 2.6461 | 0.0480 | 0.3409 | 0.0116 | 0.0142 | 0.0247 | 0.0313 | 0.0280 | 0.0854 | 0.0588 | 0.0354 | 0.0008 | 0.0267 | 0.0017 |
| DQ472026 | <i>Nautilus macromphalus</i>      | 3 | 0.0441 | 0.0125 | 0.2834 | 0.0345 | 0.1197 | 0.0023 | 0.0219 | 0.0593 |        | 0.0287 | 0.0543 |        | 0.0558 | 0.0109 |        | 0.2397 |
| KP892752 | <i>Allonautilus scrobiculatus</i> | 3 | 0.0399 | 0.0082 | 0.2834 |        | 0.0000 | 0.0001 | 0.0184 | 0.0001 | 0.0218 | 0.0000 | 0.0000 | 0.0001 | 0.0499 |        | 0.0364 | 0.0487 |

Note:

group 1: Poor-migrating group;

group 2: Free-moving group;

group 3: Fast-swimming group.

**Supplementary Table 2.** One nuclear gene (histone H3) in 143 molluscs, and their molecular traits.

| Accession No. | Species                          | Group | Ka       | Ks       | Ka/Ks  |
|---------------|----------------------------------|-------|----------|----------|--------|
| HQ009488      | <i>Crassostrea gigas</i>         | 1     | 0.000016 | 0.160432 | 0.0001 |
| AY654989      | <i>Arca imbricata</i>            | 1     | 0.000060 | 0.603923 | 0.0001 |
| AY070155      | <i>Neotrigonia margaritacea</i>  | 1     | 0.000058 | 0.583163 | 0.0001 |
| KP300485      | <i>Laevichlamys gladysiae</i>    | 1     | 0.000007 | 0.067999 | 0.0001 |
| KP300508      | <i>Spondylus wrightianus</i>     | 1     | 0.003839 | 0.022688 | 0.1692 |
| KP300507      | <i>Laevichlamys weberi</i>       | 1     | 0.000010 | 0.097620 | 0.0001 |
| KP300505      | <i>Complicachlamys wardiana</i>  | 1     | 0.000004 | 0.036130 | 0.0001 |
| HM630385      | <i>Mizuhopecten yessoensis</i>   | 1     | 0.000020 | 0.195818 | 0.0001 |
| HM622683      | <i>Azumapecten farreri</i>       | 1     | 0.000000 | 0.000005 | 0.0001 |
| KP300502      | <i>Swiftopecten swiftii</i>      | 1     | 0.000005 | 0.049822 | 0.0001 |
| HM630481      | <i>Mimachlamys senatoria</i>     | 1     | 0.003841 | 0.184521 | 0.0208 |
| KP300483      | <i>Semipallium fulvicostatum</i> | 1     | 0.000007 | 0.068905 | 0.0001 |
| KP300499      | <i>Serratovola pallula</i>       | 1     | 0.000008 | 0.083217 | 0.0001 |
| KP300498      | <i>Dentamussium oblitteratum</i> | 1     | 0.000001 | 0.000003 | 0.2247 |
| KP300497      | <i>Cryptopecten nux</i>          | 1     | 0.000000 | 0.000005 | 0.0001 |
| KP300495      | <i>Mirapecten moluccensis</i>    | 1     | 0.000011 | 0.110132 | 0.0001 |
| KP300494      | <i>Palliolium minutulum</i>      | 1     | 0.000001 | 0.000002 | 0.5075 |
| KP300492      | <i>Scaeoclamys livida</i>        | 1     | 0.000001 | 0.011224 | 0.0001 |
| KP300482      | <i>Delectopecten fosterianus</i> | 1     | 0.003829 | 0.011397 | 0.3359 |
| EU379526      | <i>Argopecten purpuratus</i>     | 1     | 0.000001 | 0.013230 | 0.0001 |
| KP300489      | <i>Veprichlamys kiwaensis</i>    | 1     | 0.000000 | 0.000005 | 0.0001 |
| KP300488      | <i>Notochlamys hexactes</i>      | 1     | 0.000000 | 0.000005 | 0.0001 |
| KR422800      | <i>Vasticardium enode</i>        | 1     | 0.000002 | 0.000000 |        |
| KR422801      | <i>Vasticardium elongatum</i>    | 1     | 0.000002 | 0.000000 |        |
| KR422802      | <i>Vasticardium flavum</i>       | 1     | 0.000002 | 0.021294 | 0.0001 |
| KR422804      | <i>Vasticardium insulare</i>     | 1     | 0.003854 | 0.000004 |        |
| KR422806      | <i>Vasticardium pectiniforme</i> | 1     | 0.000001 | 0.000001 |        |
| KR422809      | <i>Vasticardium vertebratum</i>  | 1     | 0.000001 | 0.000001 |        |
| KR422780      | <i>Microcardium velatum</i>      | 1     | 0.000025 | 0.253124 | 0.0001 |
| KR422781      | <i>Microfragum festivum</i>      | 1     | 0.000016 | 0.159544 | 0.0001 |
| KR422782      | <i>Monodacna colorata</i>        | 1     | 0.000015 | 0.150371 | 0.0001 |
| KR422783      | <i>Papillicardium papillosum</i> | 1     | 0.000017 | 0.169447 | 0.0001 |
| KR422785      | <i>Papyridea aff. crockeri</i>   | 1     | 0.007873 | 0.078630 | 0.1001 |
| KR422786      | <i>Parvicardium exiguum</i>      | 1     | 0.000003 | 0.029345 | 0.0001 |
| KR422787      | <i>Parvicardium scriptum</i>     | 1     | 0.000002 | 0.017433 | 0.0001 |
| KR422789      | <i>Trachycardium belcheri</i>    | 1     | 0.000002 | 0.024847 | 0.0001 |
| KR422790      | <i>Serripes groenlandicus</i>    | 1     | 0.000010 | 0.098707 | 0.0001 |

|          |                                  |   |          |          |        |
|----------|----------------------------------|---|----------|----------|--------|
| KP300480 | <i>Talochlamys dichroa</i>       | 1 | 0.000001 | 0.011278 | 0.0001 |
| KR422792 | <i>Trachycardium egmontianum</i> | 1 | 0.000004 | 0.036573 | 0.0001 |
| KR422797 | <i>Vasticardium angulatum</i>    | 1 | 0.000002 | 0.023135 | 0.0001 |
| KR422799 | <i>Vasticardium assimile</i>     | 1 | 0.000003 | 0.032075 | 0.0001 |
| KR422775 | <i>Lyrocardium lyratum</i>       | 1 | 0.000008 | 0.076308 | 0.0001 |
| KR422774 | <i>Laevicardium serratum</i>     | 1 | 0.000002 | 0.023634 | 0.0001 |
| KR422772 | <i>Laevicardium pictum</i>       | 1 | 0.007539 | 0.055400 | 0.1361 |
| KR422767 | <i>Keenocardium blandum</i>      | 1 | 0.000005 | 0.052359 | 0.0001 |
| KR422766 | <i>Fulvia undatopicta</i>        | 1 | 0.000006 | 0.063405 | 0.0001 |
| KR422763 | <i>Fulvia nienkeae</i>           | 1 | 0.000005 | 0.046056 | 0.0001 |
| KR422761 | <i>Fulvia mutica</i>             | 1 | 0.000006 | 0.059218 | 0.0001 |
| AY377775 | <i>Haliotis tuberculata</i>      | 2 | 0.000012 | 0.120310 | 0.0001 |
| AY377778 | <i>Crepidula fornicata</i>       | 2 | 0.000028 | 0.276938 | 0.0001 |
| EU274516 | <i>Saulea vitrea</i>             | 2 | 0.000029 | 0.291709 | 0.0001 |
| EU274514 | <i>Pomacea bridgesi</i>          | 2 | 0.000003 | 0.031949 | 0.0001 |
| EU274513 | <i>Pila polita</i>               | 2 | 0.000001 | 0.010261 | 0.0001 |
| EU274512 | <i>Pila conica</i>               | 2 | 0.000000 | 0.000005 | 0.0000 |
| EU274511 | <i>Marisa cornuarietis</i>       | 2 | 0.000001 | 0.008742 | 0.0001 |
| EU274510 | <i>Lanistes varicus</i>          | 2 | 0.000013 | 0.129191 | 0.0001 |
| EU274509 | <i>Lanistes ovum</i>             | 2 | 0.000000 | 0.000004 | 0.0604 |
| EU274507 | <i>Lanistes nyassanus</i>        | 2 | 0.000000 | 0.000005 | 0.0001 |
| EU274505 | <i>Afropomus balanoidea</i>      | 2 | 0.000012 | 0.121836 | 0.0001 |
| EU274503 | <i>Viviparus contectus</i>       | 2 | 0.007604 | 0.165074 | 0.0461 |
| EU274502 | <i>Bellamyia rubicunda</i>       | 2 | 0.000014 | 0.135835 | 0.0001 |
| EU274515 | <i>Pomacea canaliculata</i>      | 2 | 0.000015 | 0.001789 | 0.0084 |
| KF535893 | <i>Bellamyia lapillorum</i>      | 2 | 0.000001 | 0.010350 | 0.0001 |
| KF535889 | <i>Bellamyia angularis</i>       | 2 | 0.000004 | 0.003730 | 0.0011 |
| KT164405 | <i>Leptoxis ampla</i>            | 2 | 0.000002 | 0.015886 | 0.0001 |
| JX156678 | <i>Chilostoma adelozona</i>      | 2 | 0.000001 | 0.012404 | 0.0001 |
| JX156672 | <i>Causa holosericea</i>         | 2 | 0.000000 | 0.000005 | 0.0000 |
| JX156667 | <i>Chilostoma subaii</i>         | 2 | 0.000004 | 0.037694 | 0.0001 |
| JX156709 | <i>Cylindrus obtusus</i>         | 2 | 0.000010 | 0.104941 | 0.0001 |
| JX156657 | <i>Chilostoma lefeburiana</i>    | 2 | 0.000000 | 0.000005 | 0.0000 |
| JX156652 | <i>Arianta chamaeleon</i>        | 2 | 0.000003 | 0.025193 | 0.0001 |
| KC660054 | <i>Dendronotus robustus</i>      | 2 | 0.000015 | 0.153736 | 0.0001 |
| KC660051 | <i>Dendronotus lacteus</i>       | 2 | 0.000003 | 0.031885 | 0.0001 |
| KM397086 | <i>Dendronotus niveus</i>        | 2 | 0.000000 | 0.000005 | 0.0000 |
| KM103253 | <i>Pseudopomatias maasseni</i>   | 2 | 0.000118 | 1.175541 | 0.0001 |
| KP113655 | <i>Onchidoris muricata</i>       | 2 | 0.000048 | 0.479381 | 0.0001 |
| KP113646 | <i>Margarites groenlandicus</i>  | 2 | 0.000053 | 0.532188 | 0.0001 |

|          |                                      |   |          |          |        |
|----------|--------------------------------------|---|----------|----------|--------|
| KP113567 | <i>Flabellina nobilis</i>            | 2 | 0.000063 | 0.630973 | 0.0001 |
| KP113561 | <i>Limacina helicina</i>             | 2 | 0.003605 | 0.383389 | 0.0094 |
| KP113560 | <i>Lacuna vineta</i>                 | 2 | 0.000033 | 0.332216 | 0.0001 |
| KJ530680 | <i>Boreotrophon clathratus</i>       | 2 | 0.000027 | 0.273059 | 0.0001 |
| KJ095032 | <i>Chilostoma zieglerei</i>          | 2 | 0.000001 | 0.014856 | 0.0001 |
| KJ095031 | <i>Helicigona lapicida lapicida</i>  | 2 | 0.000004 | 0.038173 | 0.0001 |
| KJ095029 | <i>Cattania inflata</i>              | 2 | 0.000004 | 0.037482 | 0.0001 |
| KJ095025 | <i>Dinarica serbica</i>              | 2 | 0.000003 | 0.025030 | 0.0001 |
| KJ095024 | <i>Dinarica pouzolzi</i>             | 2 | 0.000002 | 0.024990 | 0.0001 |
| KJ095017 | <i>Causa holosericea</i>             | 2 | 0.000000 | 0.000005 | 0.0000 |
| KJ095014 | <i>Campylaea illyrica</i>            | 2 | 0.000010 | 0.012900 | 0.0008 |
| KJ095012 | <i>Arianta arbustorum</i>            | 2 | 0.000000 | 0.000005 | 0.0000 |
| JX098189 | <i>Erjavecina bergeri</i>            | 2 | 0.000007 | 0.074780 | 0.0001 |
| JX098188 | <i>Macrogastera plicatula</i>        | 2 | 0.000001 | 0.014971 | 0.0001 |
| JX098187 | <i>Pseudofusus varians</i>           | 2 | 0.000009 | 0.093201 | 0.0001 |
| JX098186 | <i>Ruthenica filograna filograna</i> | 2 | 0.000011 | 0.105227 | 0.0001 |
| KT164569 | <i>Pleurocera prasinata</i>          | 2 | 0.000006 | 0.063605 | 0.0001 |
| KF535847 | <i>Bellamyia turritus</i>            | 2 | 0.003709 | 0.010482 | 0.3538 |
| KF535846 | <i>Bellamyia dispiralis</i>          | 2 | 0.000002 | 0.000000 |        |
| AY557424 | <i>Sepioteuthis lessoniana</i>       | 3 | 0.000050 | 0.499430 | 0.0001 |
| AY557411 | <i>Argonauta nodosa</i>              | 3 | 0.000022 | 0.216874 | 0.0001 |
| AY377783 | <i>Architeuthis dux</i>              | 3 | 0.008804 | 0.145583 | 0.0605 |
| AY557413 | <i>Grandeledone verrucosa</i>        | 3 | 0.000003 | 0.029492 | 0.0001 |
| AY557414 | <i>Thaumeledone guntheri</i>         | 3 | 0.000003 | 0.029150 | 0.0001 |
| AY557406 | <i>Stauroteuthis syrtensis</i>       | 3 | 0.004847 | 0.346436 | 0.0140 |
| AY557407 | <i>Opisthoteuthis sp.</i>            | 3 | 0.000037 | 0.374274 | 0.0001 |
| AY557408 | <i>Vampyroteuthis infernalis</i>     | 3 | 0.000027 | 0.265636 | 0.0001 |
| AY557416 | <i>Heteroteuthis hawaiiensis</i>     | 3 | 0.000000 | 0.000005 | 0.0000 |
| AY557419 | <i>Stoloteuthis leucoptera</i>       | 3 | 0.000002 | 0.022630 | 0.0001 |
| AY557418 | <i>Sepiola affinis</i>               | 3 | 0.000008 | 0.083149 | 0.0001 |
| AY557417 | <i>Rossia palpebrosa</i>             | 3 | 0.000002 | 0.022053 | 0.0001 |
| AY557415 | <i>Sepia officinalis</i>             | 3 | 0.000010 | 0.096884 | 0.0001 |
| AY557420 | <i>Spirula spirula</i>               | 3 | 0.000009 | 0.089433 | 0.0001 |
| AY557421 | <i>Idiosepius pygmaeus</i>           | 3 | 0.000023 | 0.233617 | 0.0001 |
| EU735431 | <i>Planctoteuthis levimana</i>       | 3 | 0.000002 | 0.023173 | 0.0001 |
| AY557423 | <i>Loligo pealei</i>                 | 3 | 0.000004 | 0.039301 | 0.0001 |
| AY557430 | <i>Cranchia scabra</i>               | 3 | 0.004543 | 0.164782 | 0.0276 |
| AY557431 | <i>Leachia atlantica</i>             | 3 | 0.000022 | 0.219934 | 0.0001 |
| AY557432 | <i>Cycloteuthis syrventi</i>         | 3 | 0.000000 | 0.000005 | 0.0000 |
| AY557433 | <i>Discoteuthis laciniosa</i>        | 3 | 0.009130 | 0.095494 | 0.0956 |

|          |                                   |   |          |          |        |
|----------|-----------------------------------|---|----------|----------|--------|
| AY557435 | <i>Enoploteuthis leptura</i>      | 3 | 0.000030 | 0.296088 | 0.0001 |
| AY557436 | <i>Ornithoteuthis antillarum</i>  | 3 | 0.000027 | 0.269160 | 0.0001 |
| AY557439 | <i>Gonatus antarcticus</i>        | 3 | 0.018694 | 0.069798 | 0.2678 |
| AY557440 | <i>Gonatus fabricii</i>           | 3 | 0.000020 | 0.199285 | 0.0001 |
| AY557441 | <i>Histioteuthis corona</i>       | 3 | 0.000000 | 0.000005 | 0.0000 |
| AY557442 | <i>Histioteuthis hoylei</i>       | 3 | 0.000003 | 0.032082 | 0.0001 |
| AY557443 | <i>Histioteuthis reversa</i>      | 3 | 0.000002 | 0.023301 | 0.0001 |
| AY557444 | <i>Joubiniteuthis portieri</i>    | 3 | 0.000011 | 0.108931 | 0.0001 |
| AY557446 | <i>Mastigoteuthis agassizii</i>   | 3 | 0.000003 | 0.026960 | 0.0001 |
| AY557447 | <i>Mastigoteuthis magna</i>       | 3 | 0.000008 | 0.084476 | 0.0001 |
| AY557448 | <i>Neoteuthis thielei</i>         | 3 | 0.004282 | 0.047872 | 0.0894 |
| AY557449 | <i>Octopoteuthis sicula</i>       | 3 | 0.004293 | 0.047863 | 0.0897 |
| AY557450 | <i>Illex coindetii</i>            | 3 | 0.000000 | 0.000005 | 0.0000 |
| AY557451 | <i>Ommastrephes bartrami</i>      | 3 | 0.004360 | 0.000004 |        |
| AY557452 | <i>Sthenoteuthis oualeniensis</i> | 3 | 0.000001 | 0.012765 | 0.0001 |
| AY557453 | <i>Moroteuthis knipovitchi</i>    | 3 | 0.000014 | 0.138847 | 0.0001 |
| AY557454 | <i>Psychroteuthis sp.</i>         | 3 | 0.004328 | 0.078958 | 0.0548 |
| EU735404 | <i>Sepiella inermis</i>           | 3 | 0.000010 | 0.096897 | 0.0001 |
| EU735405 | <i>Lolliguncula diomedea</i>      | 3 | 0.000005 | 0.054449 | 0.0001 |
| EU735421 | <i>Gonatopsis sp.</i>             | 3 | 0.000010 | 0.095446 | 0.0001 |
| EU735419 | <i>Pterygioteuthis giardi</i>     | 3 | 0.000050 | 0.495444 | 0.0001 |
| EU735440 | <i>Magnapinna sp.</i>             | 3 | 0.000012 | 0.122754 | 0.0001 |
| EU735439 | <i>Octopoteuthis megaptera</i>    | 3 | 0.000000 | 0.000005 | 0.0000 |
| EU735438 | <i>Octopoteuthis danae</i>        | 3 | 0.000000 | 0.000005 | 0.0000 |
| EU735423 | <i>Berryteuthis magister</i>      | 3 | 0.004281 | 0.103198 | 0.0415 |
| EU735426 | <i>Histioteuthis bonellii</i>     | 3 | 0.000002 | 0.022920 | 0.0001 |

Note:

group 1: Poor-migrating group;

group 2: Free-moving group;

group 3: Fast-swimming group.



**Supplementary Table 3.** The ATP8 gene in 166 molluscs, and their molecular traits.

| Accession No. | Species                            | Ka/Ks   | Groups                        | Average Ka/Ks |
|---------------|------------------------------------|---------|-------------------------------|---------------|
| AB809077      | <i>Fulvia mutica</i>               | 0.61300 |                               |               |
| KF534717      | <i>Laternula elliptica</i>         | 0.01140 |                               |               |
| KC768038      | <i>Ostrea lurida</i>               | 0.29180 |                               |               |
| JQ970425      | <i>Perna viridis</i>               | 0.01300 |                               |               |
| KF214684      | <i>Mimachlamys senatoria</i>       | 0.38120 |                               |               |
| DQ632742      | <i>Hiatella arctica</i>            | 0.01650 |                               |               |
| GU071281      | <i>Meretrix lamarckii</i>          | 0.00010 |                               |               |
| JF969278      | <i>Paphia undulata</i>             | 0.00010 | Marine bivalve<br>species     | 0.1722        |
| JF969276      | <i>Paphia amabilis</i>             | 0.01620 |                               |               |
| KC832317      | <i>Meretrix lyrata</i>             | 0.00720 |                               |               |
| EF043342      | <i>Lucinella divaricata</i>        | 0.10320 |                               |               |
| EF043341      | <i>Loripes lacteus</i>             | 0.17520 |                               |               |
| KR856227      | <i>Crassostrea gasar</i>           | 0.27270 |                               |               |
| KR862368      | <i>Calyptogena magnifica</i>       | 0.08030 |                               |               |
| KP756905      | <i>Limnoperna fortunei</i>         | 0.20050 |                               |               |
| KM233636      | <i>Brachidontes exustus</i>        | 0.57350 |                               |               |
| KF296320      | <i>Solenia oleivora</i>            | 0.11800 |                               |               |
| AY365193      | <i>Lampsilis ornata</i>            | 0.02500 |                               |               |
| HM347668      | <i>Hyriopsis cumingii</i>          | 0.17410 |                               |               |
| KC848654      | <i>Solenia carinatus</i>           | 0.17830 |                               |               |
| HM856639      | <i>Toxolasma parvus</i>            | 0.01350 |                               |               |
| HM856638      | <i>Lasmigona compressa</i>         | 0.05660 |                               |               |
| HM856635      | <i>Utterbackia peninsularis</i>    | 0.01070 |                               |               |
| HM856634      | <i>Margaritifera falcata</i>       | 0.06000 |                               |               |
| HM014130      | <i>Unio pictorum</i>               | 0.19120 |                               |               |
| FJ809754      | <i>Pyganodon grandis</i>           | 0.00010 |                               |               |
| FJ809752      | <i>Venustaconcha ellipsiformis</i> | 0.11200 |                               |               |
| JQ728447      | <i>Solemya velum</i>               | 0.56770 | Freshwater bivalve<br>species | 0.0988        |
| JX050180      | <i>Lamprotula coreana</i>          | 0.39990 |                               |               |
| KM657954      | <i>Unio douglasiae</i>             | 0.07820 |                               |               |
| KM580067      | <i>Panopea generosa</i>            | 0.00010 |                               |               |
| KF514426      | <i>Dahurinaia daturica</i>         | 0.00010 |                               |               |
| KJ144818      | <i>Arconaia lanceolata</i>         | 0.00010 |                               |               |
| KJ018924      | <i>Lamprotula gottschei</i>        | 0.01430 |                               |               |
| KF667529      | <i>Anodonta lucida</i>             | 0.09790 |                               |               |
| KP187851      | <i>Anodonta euscaphys</i>          | 0.07350 |                               |               |
| KT247374      | <i>Potomida littoralis</i>         | 0.00010 |                               |               |
| KT723012      | <i>Leptodea leptodon</i>           | 0.00010 |                               |               |
| KP273584      | <i>Cuneopsis pisciculus</i>        | 0.10090 |                               |               |
| KJ472483      | <i>Haliotis laevigata</i>          | 0.00010 |                               |               |
| KF724723      | <i>Haliotis discus hannai</i>      | 0.00430 | Gastropodas species           | 0.1453        |
| HQ832672      | <i>Haliotis diversicolor</i>       | 0.04080 |                               |               |

|          |                                         |         |
|----------|-----------------------------------------|---------|
| FJ605487 | <i>Haliotis tuberculata</i>             | 0.08560 |
| FJ599667 | <i>Haliotis tuberculata tuberculata</i> | 0.00010 |
| KT207826 | <i>Tegula lividomaculata</i>            | 0.00010 |
| KR297248 | <i>Angaria neglecta</i>                 | 0.03710 |
| KF700096 | <i>Lunella aff. cinerea</i>             | 0.00170 |
| LC107880 | <i>Lepetodrilus nux</i>                 | 0.07460 |
| KR297250 | <i>Lepetodrilus schrolli</i>            | 0.00000 |
| KR297249 | <i>Granata lyrata</i>                   | 0.32400 |
| KT207825 | <i>Diodora graeca</i>                   | 0.10670 |
| JN790612 | <i>Fissurella volcano</i>               | 0.37320 |
| AP013032 | <i>Chrysomallon squamiferum</i>         | 0.47270 |
| KR297251 | <i>Phasianella solida</i>               | 0.02260 |
| KF728890 | <i>Nerita versicolor</i>                | 0.06730 |
| GU810158 | <i>Nerita melanotragus</i>              | 0.18720 |
| KF728889 | <i>Nerita tessellata</i>                | 0.00000 |
| KF728888 | <i>Nerita fulgurans</i>                 | 0.00000 |
| KF148053 | <i>Aplysia kurodai</i>                  | 0.00010 |
| AY569552 | <i>Aplysia californica</i>              | 0.00010 |
| DQ991927 | <i>Aplysia dactylomela</i>              | 0.08130 |
| AY083457 | <i>Roboastra europaea</i>               | 0.02330 |
| JN620539 | <i>Melibe leonina</i>                   | 0.00010 |
| JN627205 | <i>Salinator rhamphidia</i>             | 0.51290 |
| AY345049 | <i>Siphonaria gigas</i>                 | 0.21080 |
| AY345022 | <i>Siphonaria pectinata</i>             | 0.35780 |
| EU599581 | <i>Ascobulla fragilis</i>               | 0.00010 |
| AY345048 | <i>Elysia chlorotica</i>                | 0.51800 |
| JN632509 | <i>Trimusculus reticulatus</i>          | 0.00340 |
| AB028237 | <i>Pupa strigosa</i>                    | 0.67210 |
| KP716634 | <i>Naticarius hebraeus</i>              | 0.01430 |
| KM245630 | <i>Strombus gigas</i>                   | 0.00190 |
| HM174254 | <i>Eualetes tulipa</i>                  | 0.00250 |
| HM174253 | <i>Dendropoma maximum</i>               | 0.09040 |
| HM174252 | <i>Dendropoma gregarium</i>             | 0.06340 |
| HM174255 | <i>Thylacodes squamigerus</i>           | 0.26000 |
| KT962044 | <i>Buccinum pemphigus</i>               | 0.07840 |
| KF897830 | <i>Babylonia lutosa</i>                 | 0.07890 |
| HQ416443 | <i>Babylonia areolata</i>               | 0.03230 |
| KT382829 | <i>Volutharpa perryi</i>                | 0.18180 |
| KM603509 | <i>Varicinassa variciferus</i>          | 0.00010 |
| EU827201 | <i>Nassarius reticulatus</i>            | 0.00010 |
| EU827195 | <i>Cancellaria cancellata</i>           | 0.14350 |
| KT199301 | <i>Conus tribblei</i>                   | 0.10440 |
| KR006970 | <i>Conus tulipa</i>                     | 0.01330 |
| DQ862058 | <i>Conus textile</i>                    | 0.11160 |

|           |                                        |         |
|-----------|----------------------------------------|---------|
| KF887950  | <i>Conus consors</i>                   | 0.27620 |
| EU827198  | <i>Conus borgesii</i>                  | 0.02820 |
| EU827197  | <i>Fusiturris similis</i>              | 0.13240 |
| DQ284754  | <i>Lophiotoma cerithiformis</i>        | 0.04770 |
| EU827196  | <i>Terebra dimidiata</i>               | 0.01290 |
| KM213962  | <i>Rapana venosa</i>                   | 0.00010 |
| JQ446041  | <i>Concholepas concholepas</i>         | 0.01020 |
| DQ159954  | <i>Reishia clavigera</i>               | 0.00000 |
| EU827194  | <i>Bolinus brandaris</i>               | 0.09680 |
| EU827199  | <i>Cymbium olla</i>                    | 0.16340 |
| GU196685  | <i>Amalda northlandica</i>             | 0.01660 |
| KF736848  | <i>Semisulcospira libertina</i>        | 0.50800 |
| KC757644  | <i>Ifremeria nautili</i>               | 0.07870 |
| DQ238599  | <i>Lottia digitalis</i>                | 0.27120 |
| JN564796  | <i>Galba pervia</i>                    | 0.72790 |
| KP098541  | <i>Radix balthica</i>                  | 0.00180 |
| KP098540  | <i>Radix auricularia</i>               | 0.15040 |
| KP279638  | <i>Radix swinhoei</i>                  | 0.00010 |
| JQ390526  | <i>Physella acuta</i>                  | 0.00000 |
| KP279639  | <i>Planorbarius corneus</i>            | 0.00010 |
| AY380567  | <i>Biomphalaria glabrata</i>           | 0.00000 |
| EF433576  | <i>Biomphalaria tenagophila</i>        | 0.00010 |
| KM503121  | <i>Cipangopaliduna cathayensis</i>     | 0.20960 |
| KM100140  | <i>Marisa cornuarietis</i>             | 0.39960 |
| KJ739609  | <i>Pomacea canaliculata</i>            | 0.32760 |
| KR350466  | <i>Pomacea maculata</i>                | 0.00010 |
| EU079378  | <i>Oncomelania hupensis robertsoni</i> | 0.06200 |
| EU001660  | <i>Oncomelania hupensis hupensis</i>   | 0.00000 |
| FJ997214  | <i>Oncomelania hupensis</i>            | 0.35220 |
| GQ996415  | <i>Potamopyrgus estuarinus</i>         | 0.00000 |
| GQ996430  | <i>Potamopyrgus antipodarum</i>        | 0.00010 |
| KM365085  | <i>Cerion incanum</i>                  | 0.45970 |
| KJ744205  | <i>Achatina fulica</i>                 | 0.01950 |
| KM083123  | <i>Mastiguelota kiangsinensis</i>      | 0.18090 |
| KT192071  | <i>Aegista aubryana</i>                | 0.00600 |
| JQ417194  | <i>Helix aspersa</i>                   | 0.11950 |
| JN107636  | <i>Cylindrus obtusus</i>               | 0.21000 |
| KT821554  | <i>Naesiotus nux</i>                   | 0.74140 |
| NC_001761 | <i>Albinaria caerulea</i>              | 0.57640 |
| KC185403  | <i>Gastrocopta cristata</i>            | 0.29230 |
| JN619346  | <i>Peronia peronii</i>                 | 0.66690 |
| JN619347  | <i>Rhopalocaulis grandidieri</i>       | 0.01660 |
| JN615140  | <i>Pedipes pedipes</i>                 | 0.83950 |
| JN615139  | <i>Ovatella vulcani</i>                | 0.00010 |

|          |                                   |         |             |        |
|----------|-----------------------------------|---------|-------------|--------|
| JN606067 | <i>Myosotella myosotis</i>        | 0.01220 |             |        |
| AP013074 | <i>Sepia latimanus</i>            | 0.07840 |             |        |
| KJ162574 | <i>Sepia lycidas</i>              | 0.05580 |             |        |
| AB240155 | <i>Sepia officinalis</i>          | 0.01510 |             |        |
| KC632521 | <i>Sepia pharaonis</i>            | 0.09260 |             |        |
| KF690633 | <i>Sepia aculeata</i>             | 0.02060 |             |        |
| KF040369 | <i>Sepiella inermis</i>           | 0.09030 |             |        |
| AB675082 | <i>Sepiella japonica</i>          | 0.00000 |             |        |
| KR912215 | <i>Sepiella maindroni</i>         | 0.00000 |             |        |
| KF647895 | <i>Idiosepius</i> sp.             | 0.22180 |             |        |
| AP012226 | <i>Semirossia patagonica</i>      | 0.26930 |             |        |
| AB029616 | <i>Loligo bleekeri</i>            | 0.00960 |             |        |
| KM878671 | <i>Sepioteuthis lessoniana</i>    | 0.05940 |             |        |
| KT254309 | <i>Loliolus beka</i>              | 0.02050 |             |        |
| KP265013 | <i>Loliolus uyii</i>              | 0.14030 |             |        |
| KT362380 | <i>Uroteuthis chinensis</i>       | 0.03440 |             |        |
| KR051264 | <i>Uroteuthis duvaucelii</i>      | 0.03030 |             |        |
| AB675080 | <i>Uroteuthis edulis</i>          | 0.00010 |             |        |
| KC701763 | <i>Architeuthis dux</i>           | 0.10350 | Cephalopods | 0.0665 |
| AP012225 | <i>Bathyteuthis abyssicola</i>    | 0.00000 | species     |        |
| KJ845633 | <i>Watasenia scintillans</i>      | 0.05280 |             |        |
| EU068697 | <i>Dosidicus gigas</i>            | 0.00010 |             |        |
| EU660576 | <i>Sthenoteuthis oualaniensis</i> | 0.00840 |             |        |
| AB240153 | <i>Todarodes pacificus</i>        | 0.06350 |             |        |
| KP336702 | <i>Illex argentinus</i>           | 0.02050 |             |        |
| KT428877 | <i>Amphioctopus aegina</i>        | 0.01520 |             |        |
| AB240156 | <i>Amphioctopus fangsiao</i>      | 0.00010 |             |        |
| KF017606 | <i>Cistopus chinensis</i>         | 0.24680 |             |        |
| KF017605 | <i>Cistopus taiwanicus</i>        | 0.07180 |             |        |
| KT581981 | <i>Octopus bimaculatus</i>        | 0.00940 |             |        |
| KJ789854 | <i>Octopus conispadiceus</i>      | 0.08120 |             |        |
| HQ638215 | <i>Octopus minor</i>              | 0.01350 |             |        |
| AB158363 | <i>Octopus vulgaris</i>           | 0.04050 |             |        |
| AB266515 | <i>Vampyroteuthis infernalis</i>  | 0.34090 |             |        |
| DQ472026 | <i>Nautilus macromphalus</i>      | 0.11970 |             |        |
| KP892752 | <i>Allonautilus scrobiculatus</i> | 0.00000 |             |        |

---

Marine bivalve species vs. Freshwater bivalve species, P=0.188

Marine bivalve species vs. Gastropodas species, P=0.628

Marine bivalve species vs. Cephalopods species, P=0.062

**Supplementary Figure 1** The ML tree based on (A) *ATP6*, (B) *CoxI*, (C) *CoxII* and (D) *Cytb* gene in molluscs

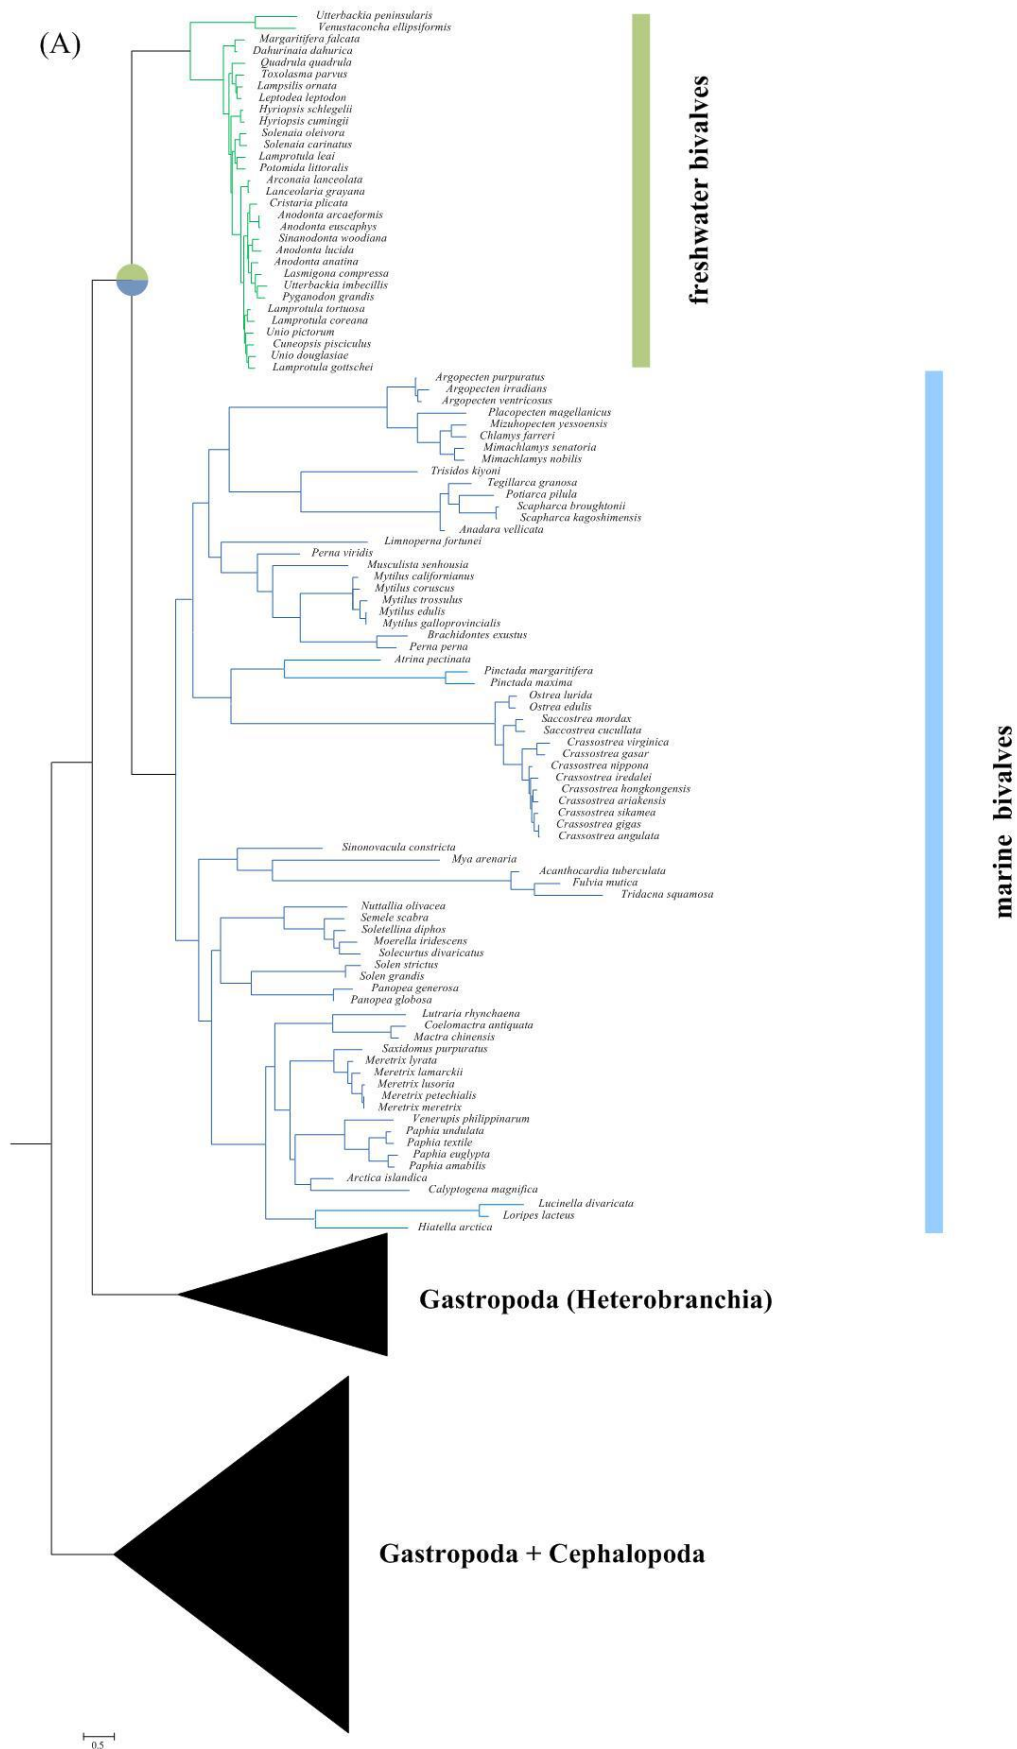

(B)

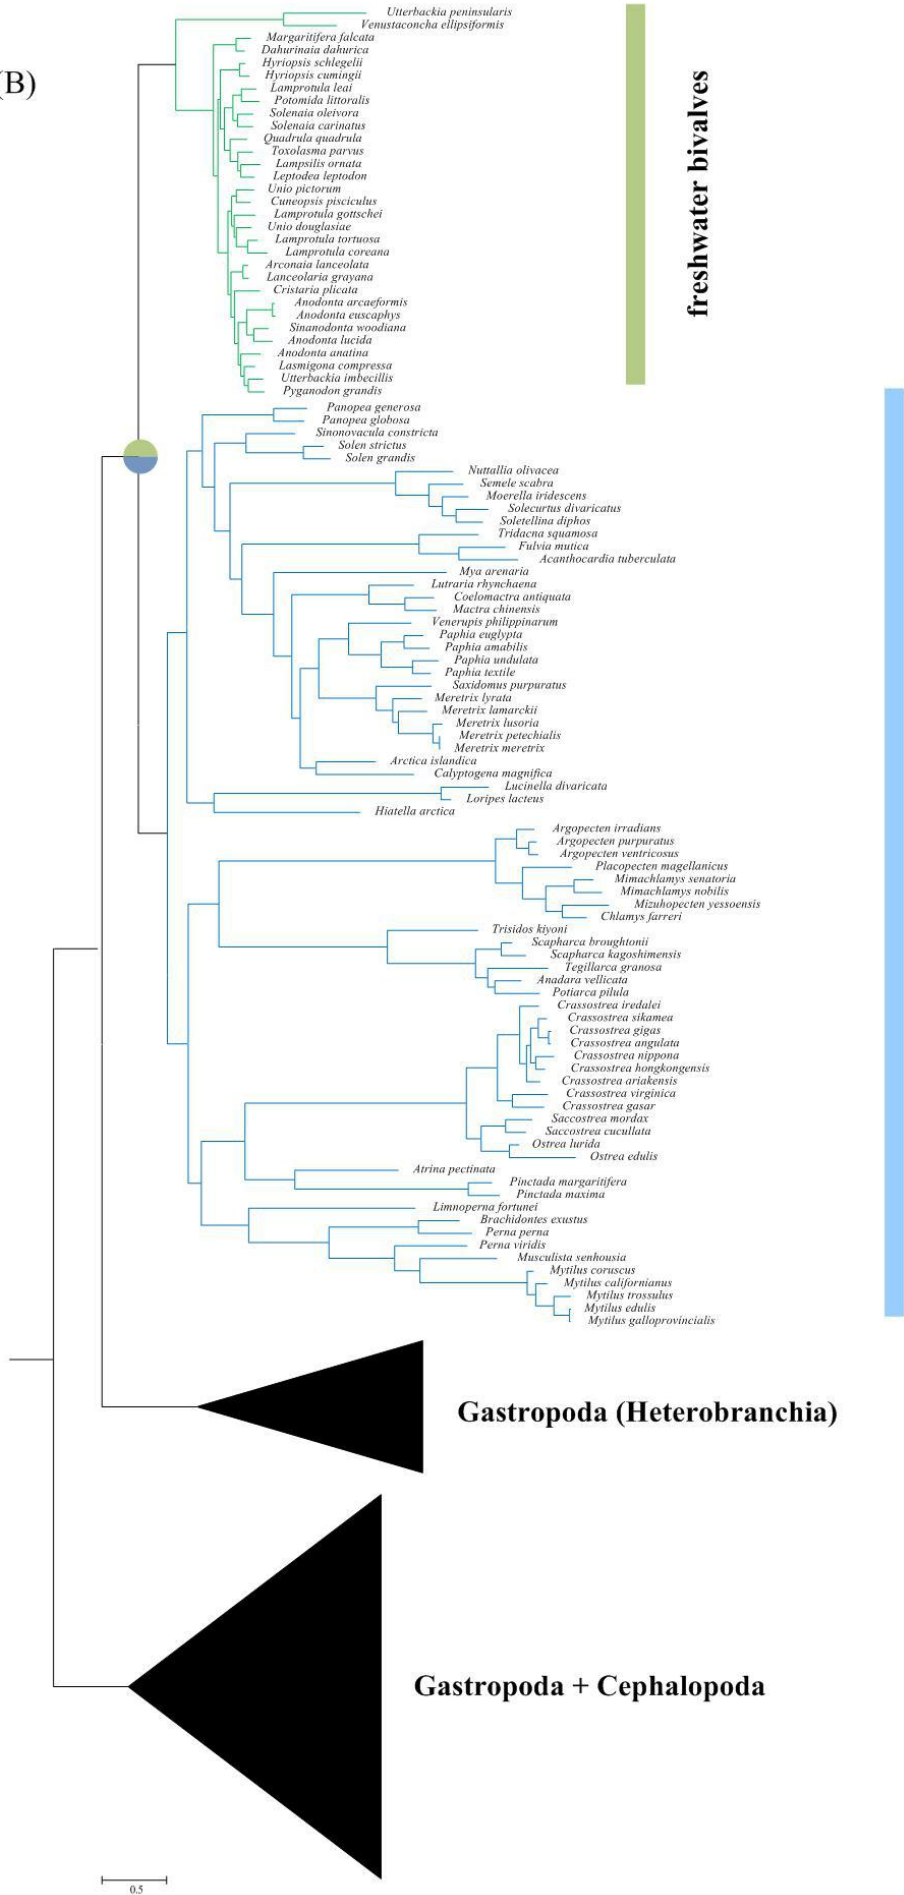

freshwater bivalves

marine bivalves

Gastropoda (Heterobranchia)

Gastropoda + Cephalopoda

0.5

(C)

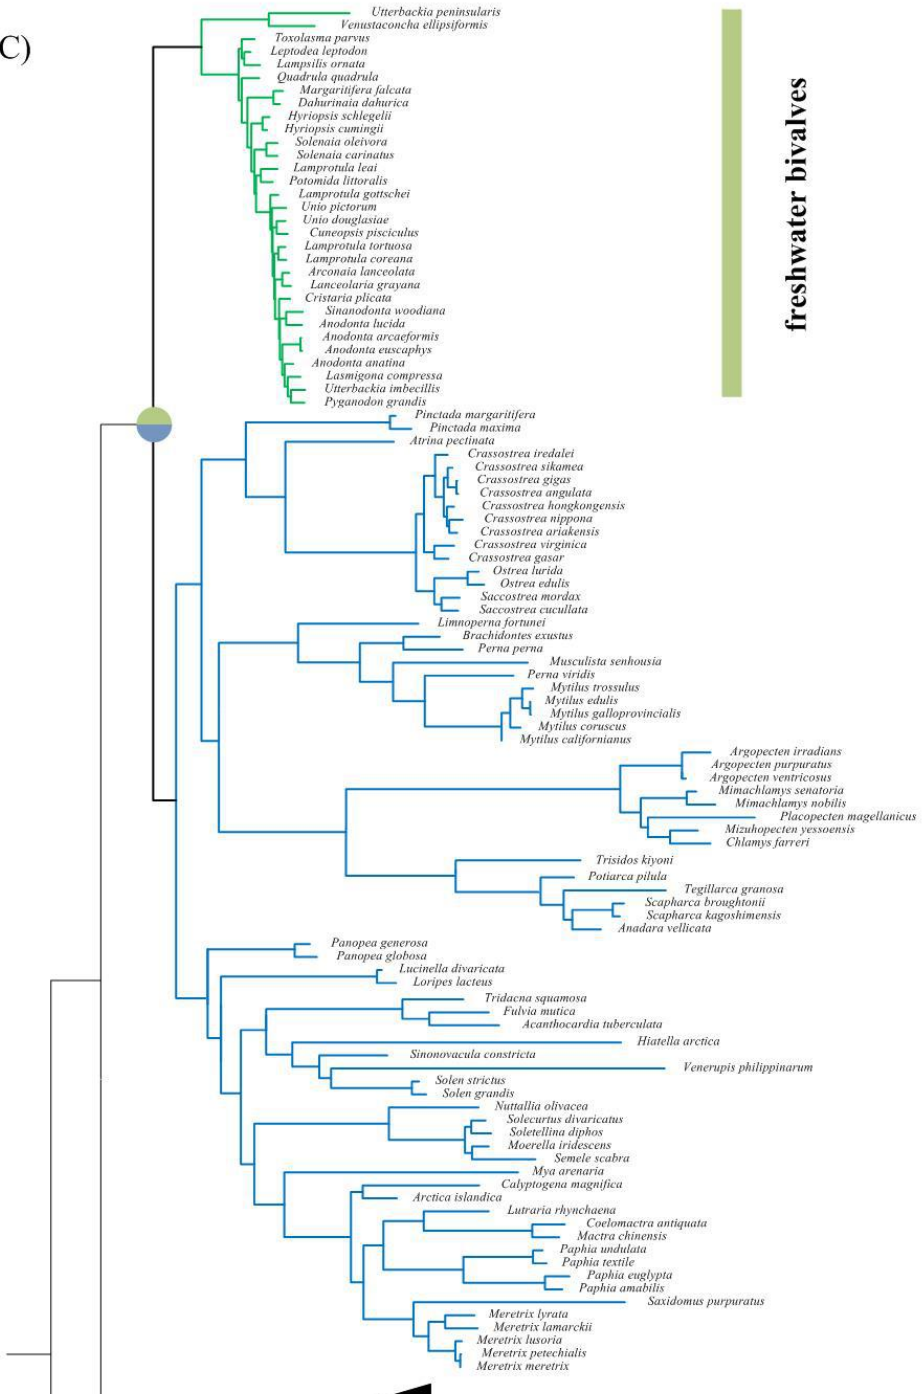

freshwater bivalves

marine bivalves

Gastropoda (Heterobranchia)

Gastropoda + Cephalopoda

0.5

(D)

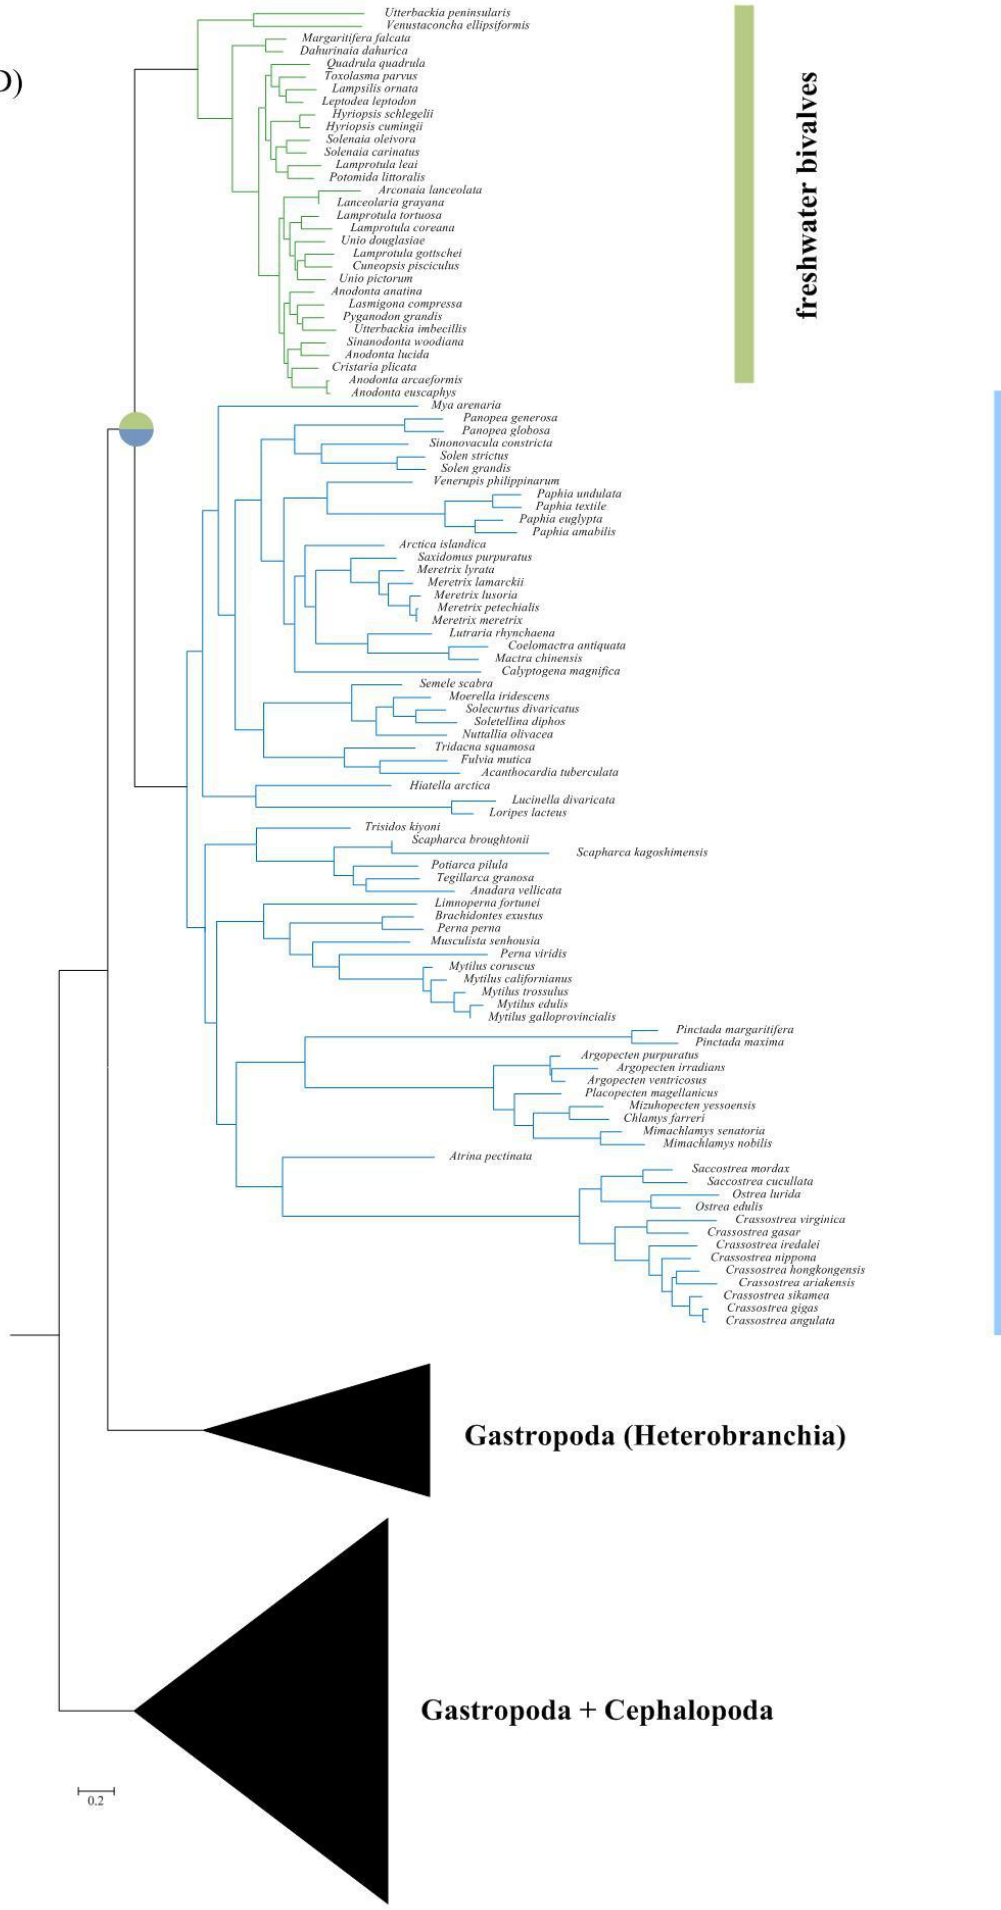

freshwater bivalves

marine bivalves

Gastropoda (Heterobranchia)

Gastropoda + Cephalopoda

0.2
